# Supplementary material for: Immunome perturbation is present in patients with juvenile idiopathic arthritis who are in remission and will relapse upon anti-TNFα withdrawal
Source: PubMed Central journal article supplement (PMC6900250; doi:10.1136/annrheumdis-2019-216059), 2019-09-20

## Supplementary Figure S1

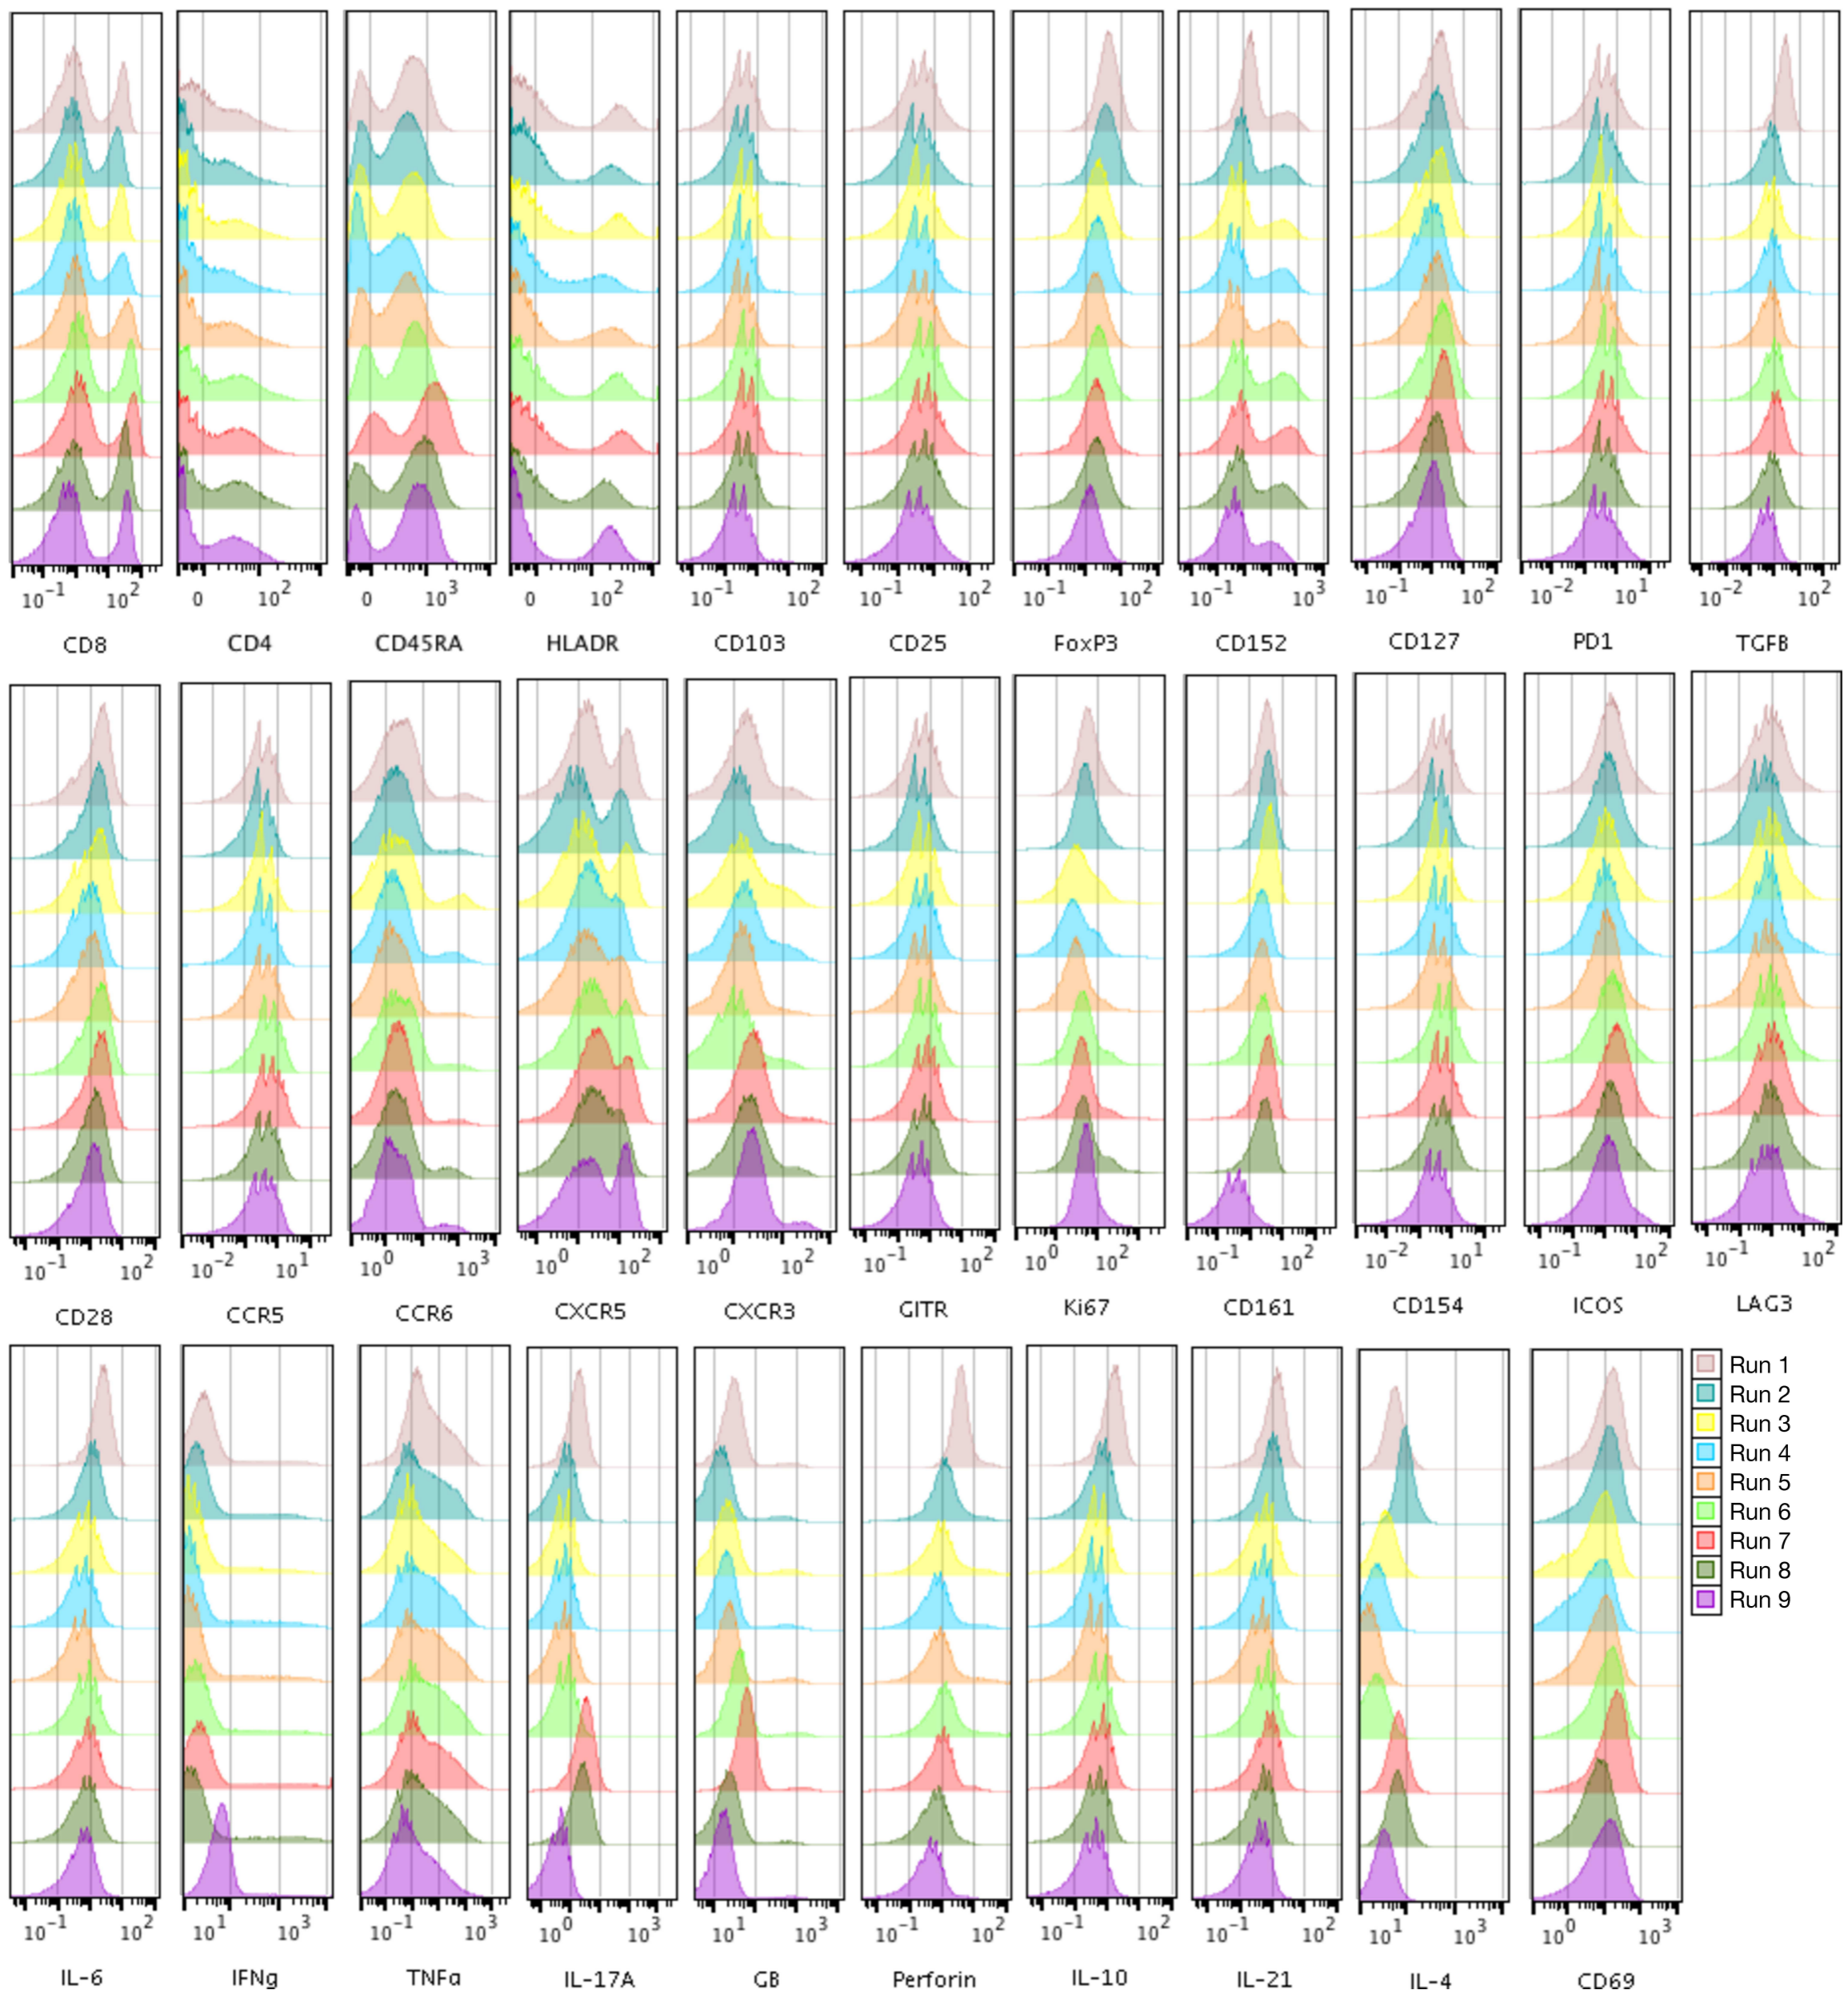

## Supplementary Figure S2

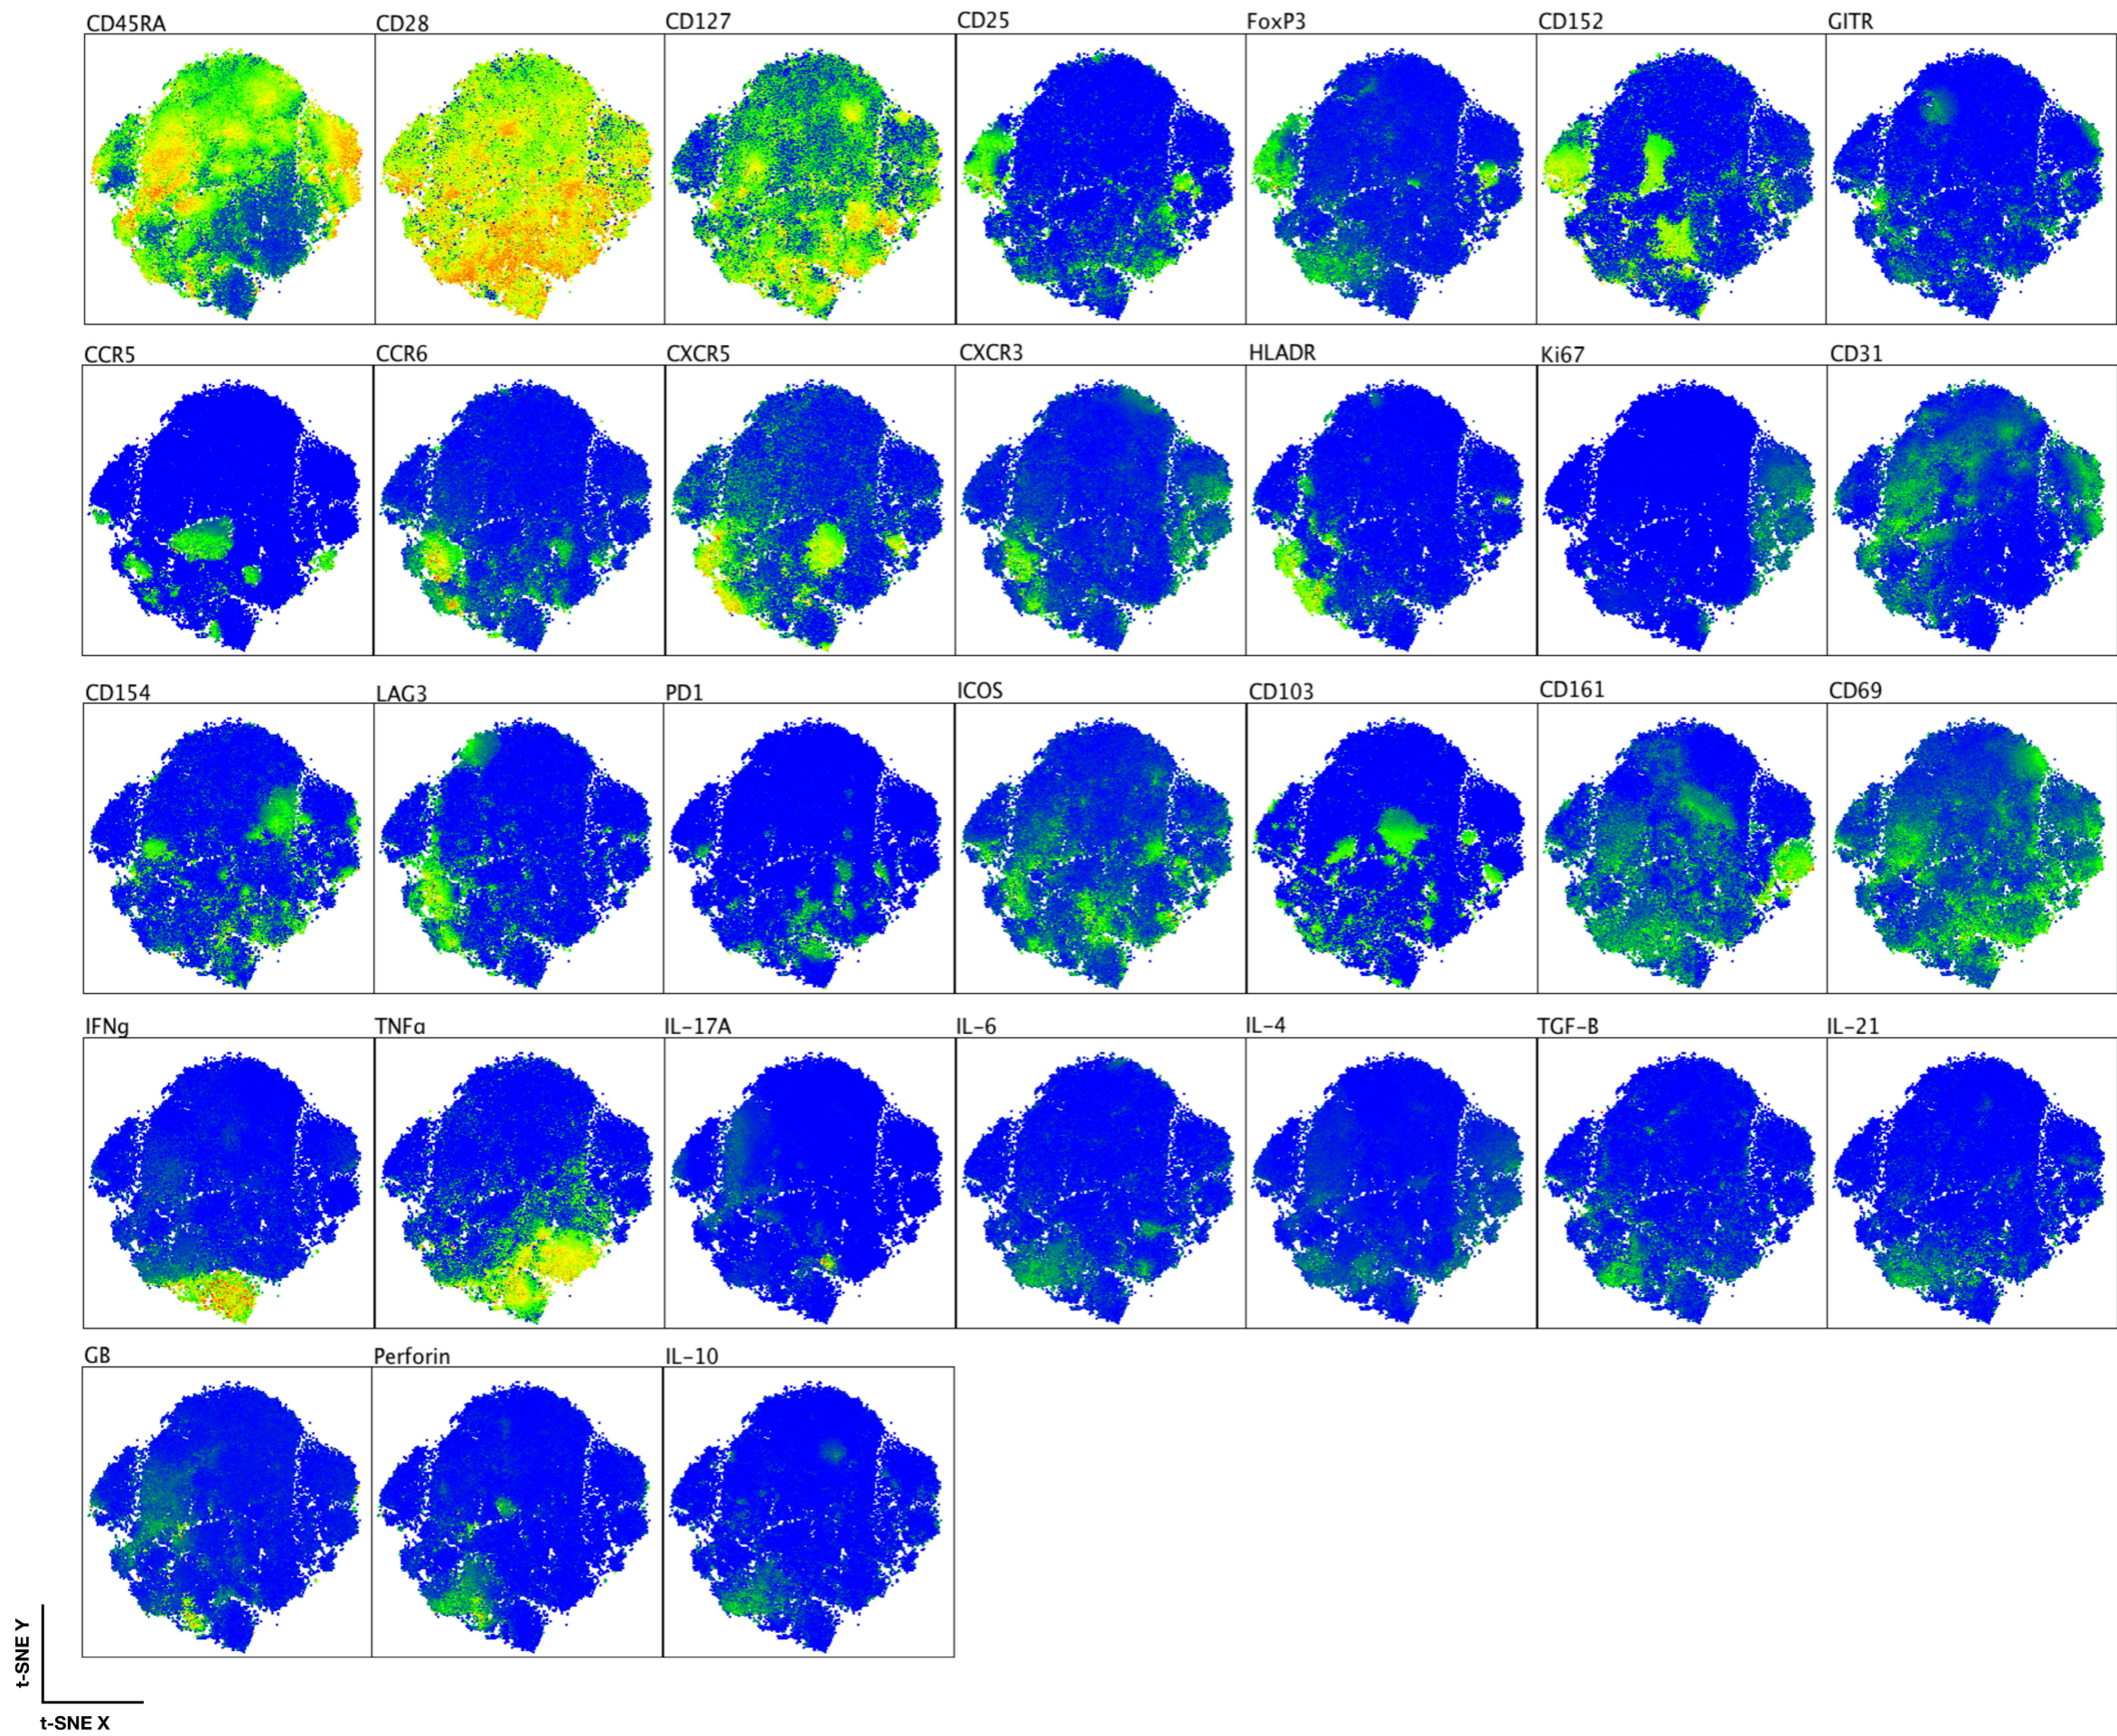

Supplementary Figure S3

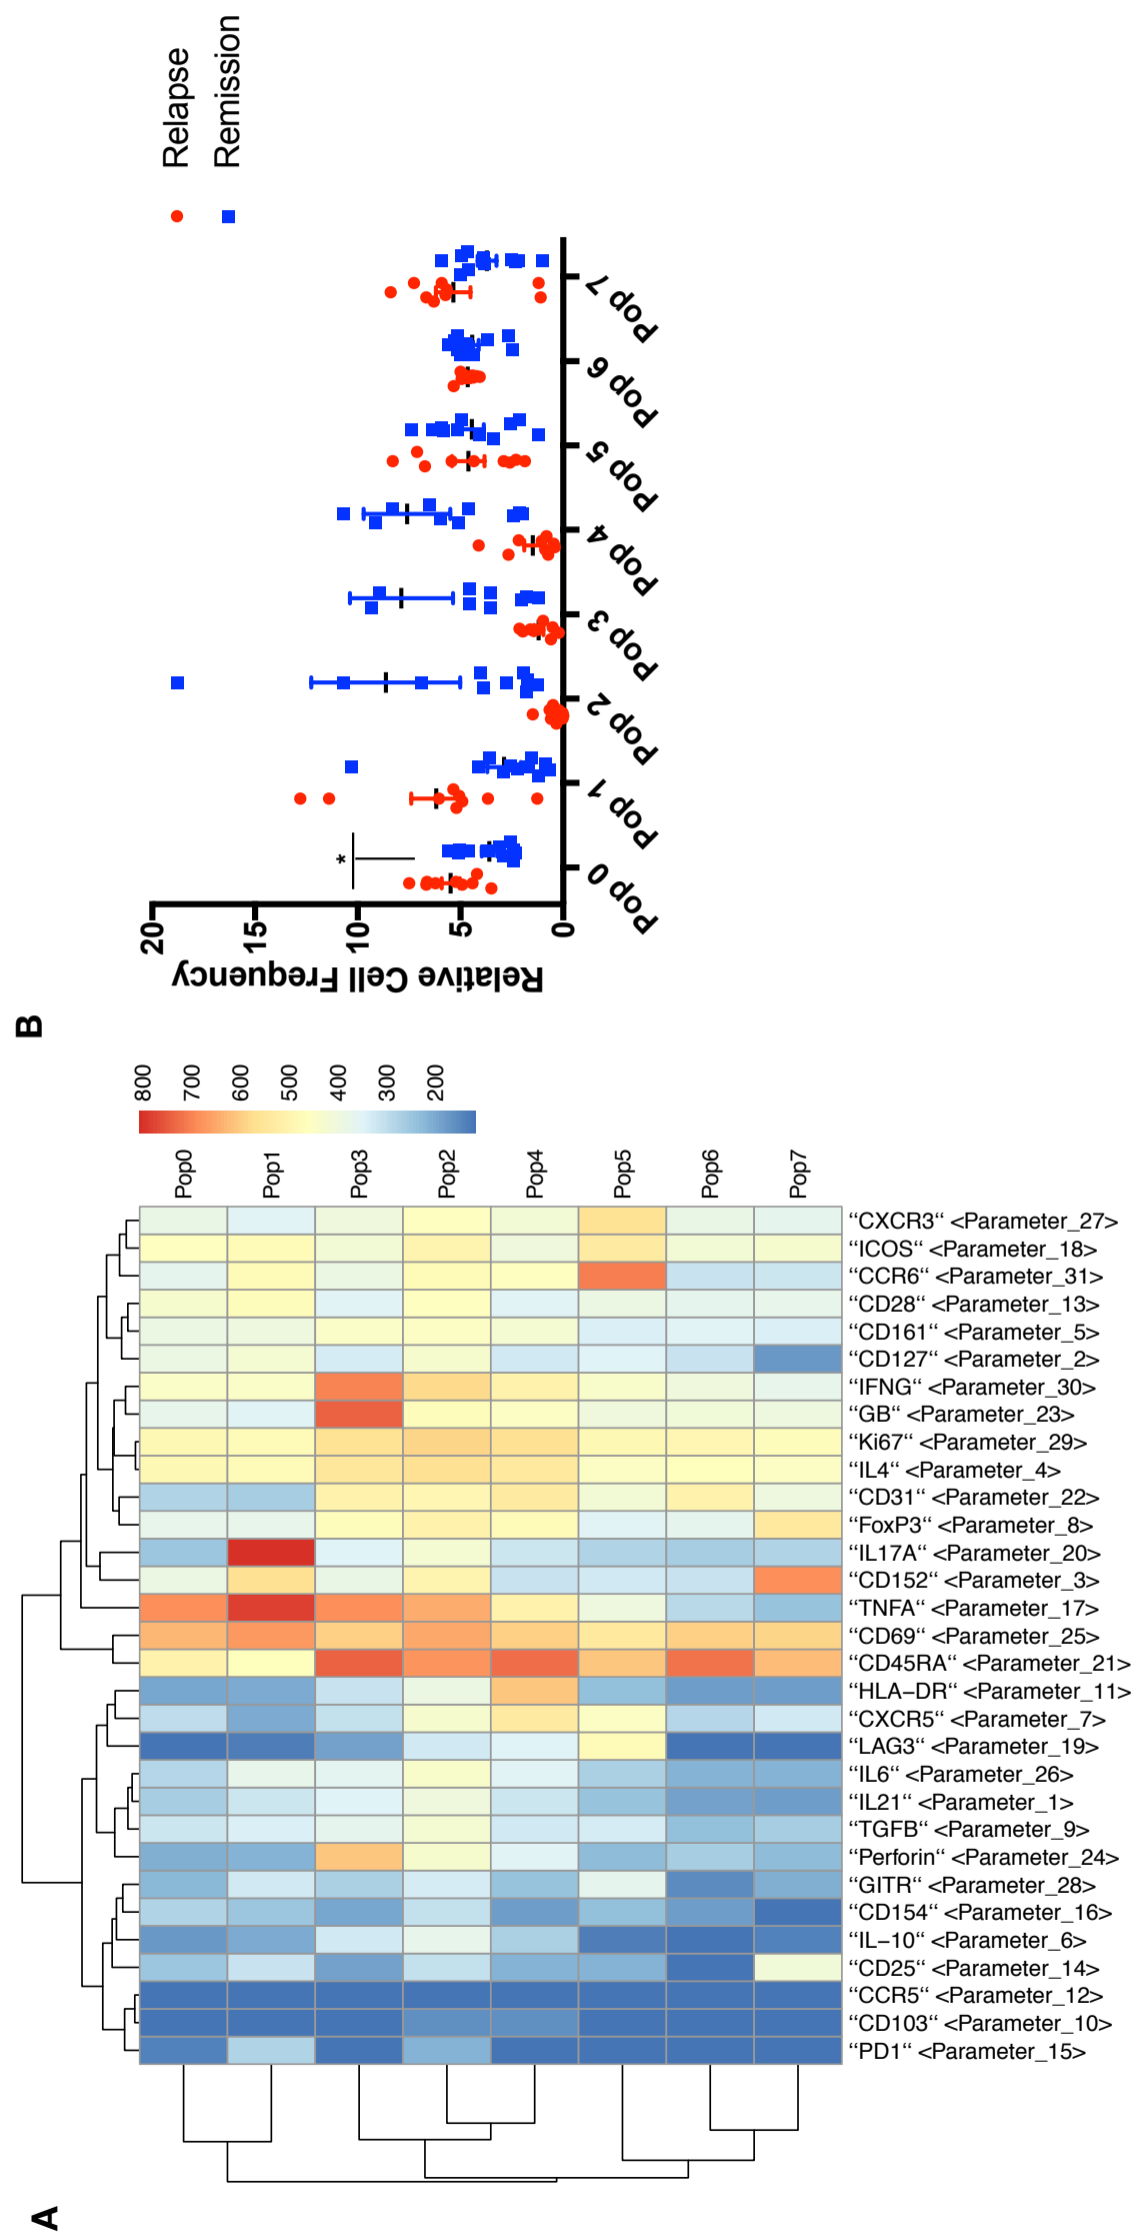

Supplementary Figure S4

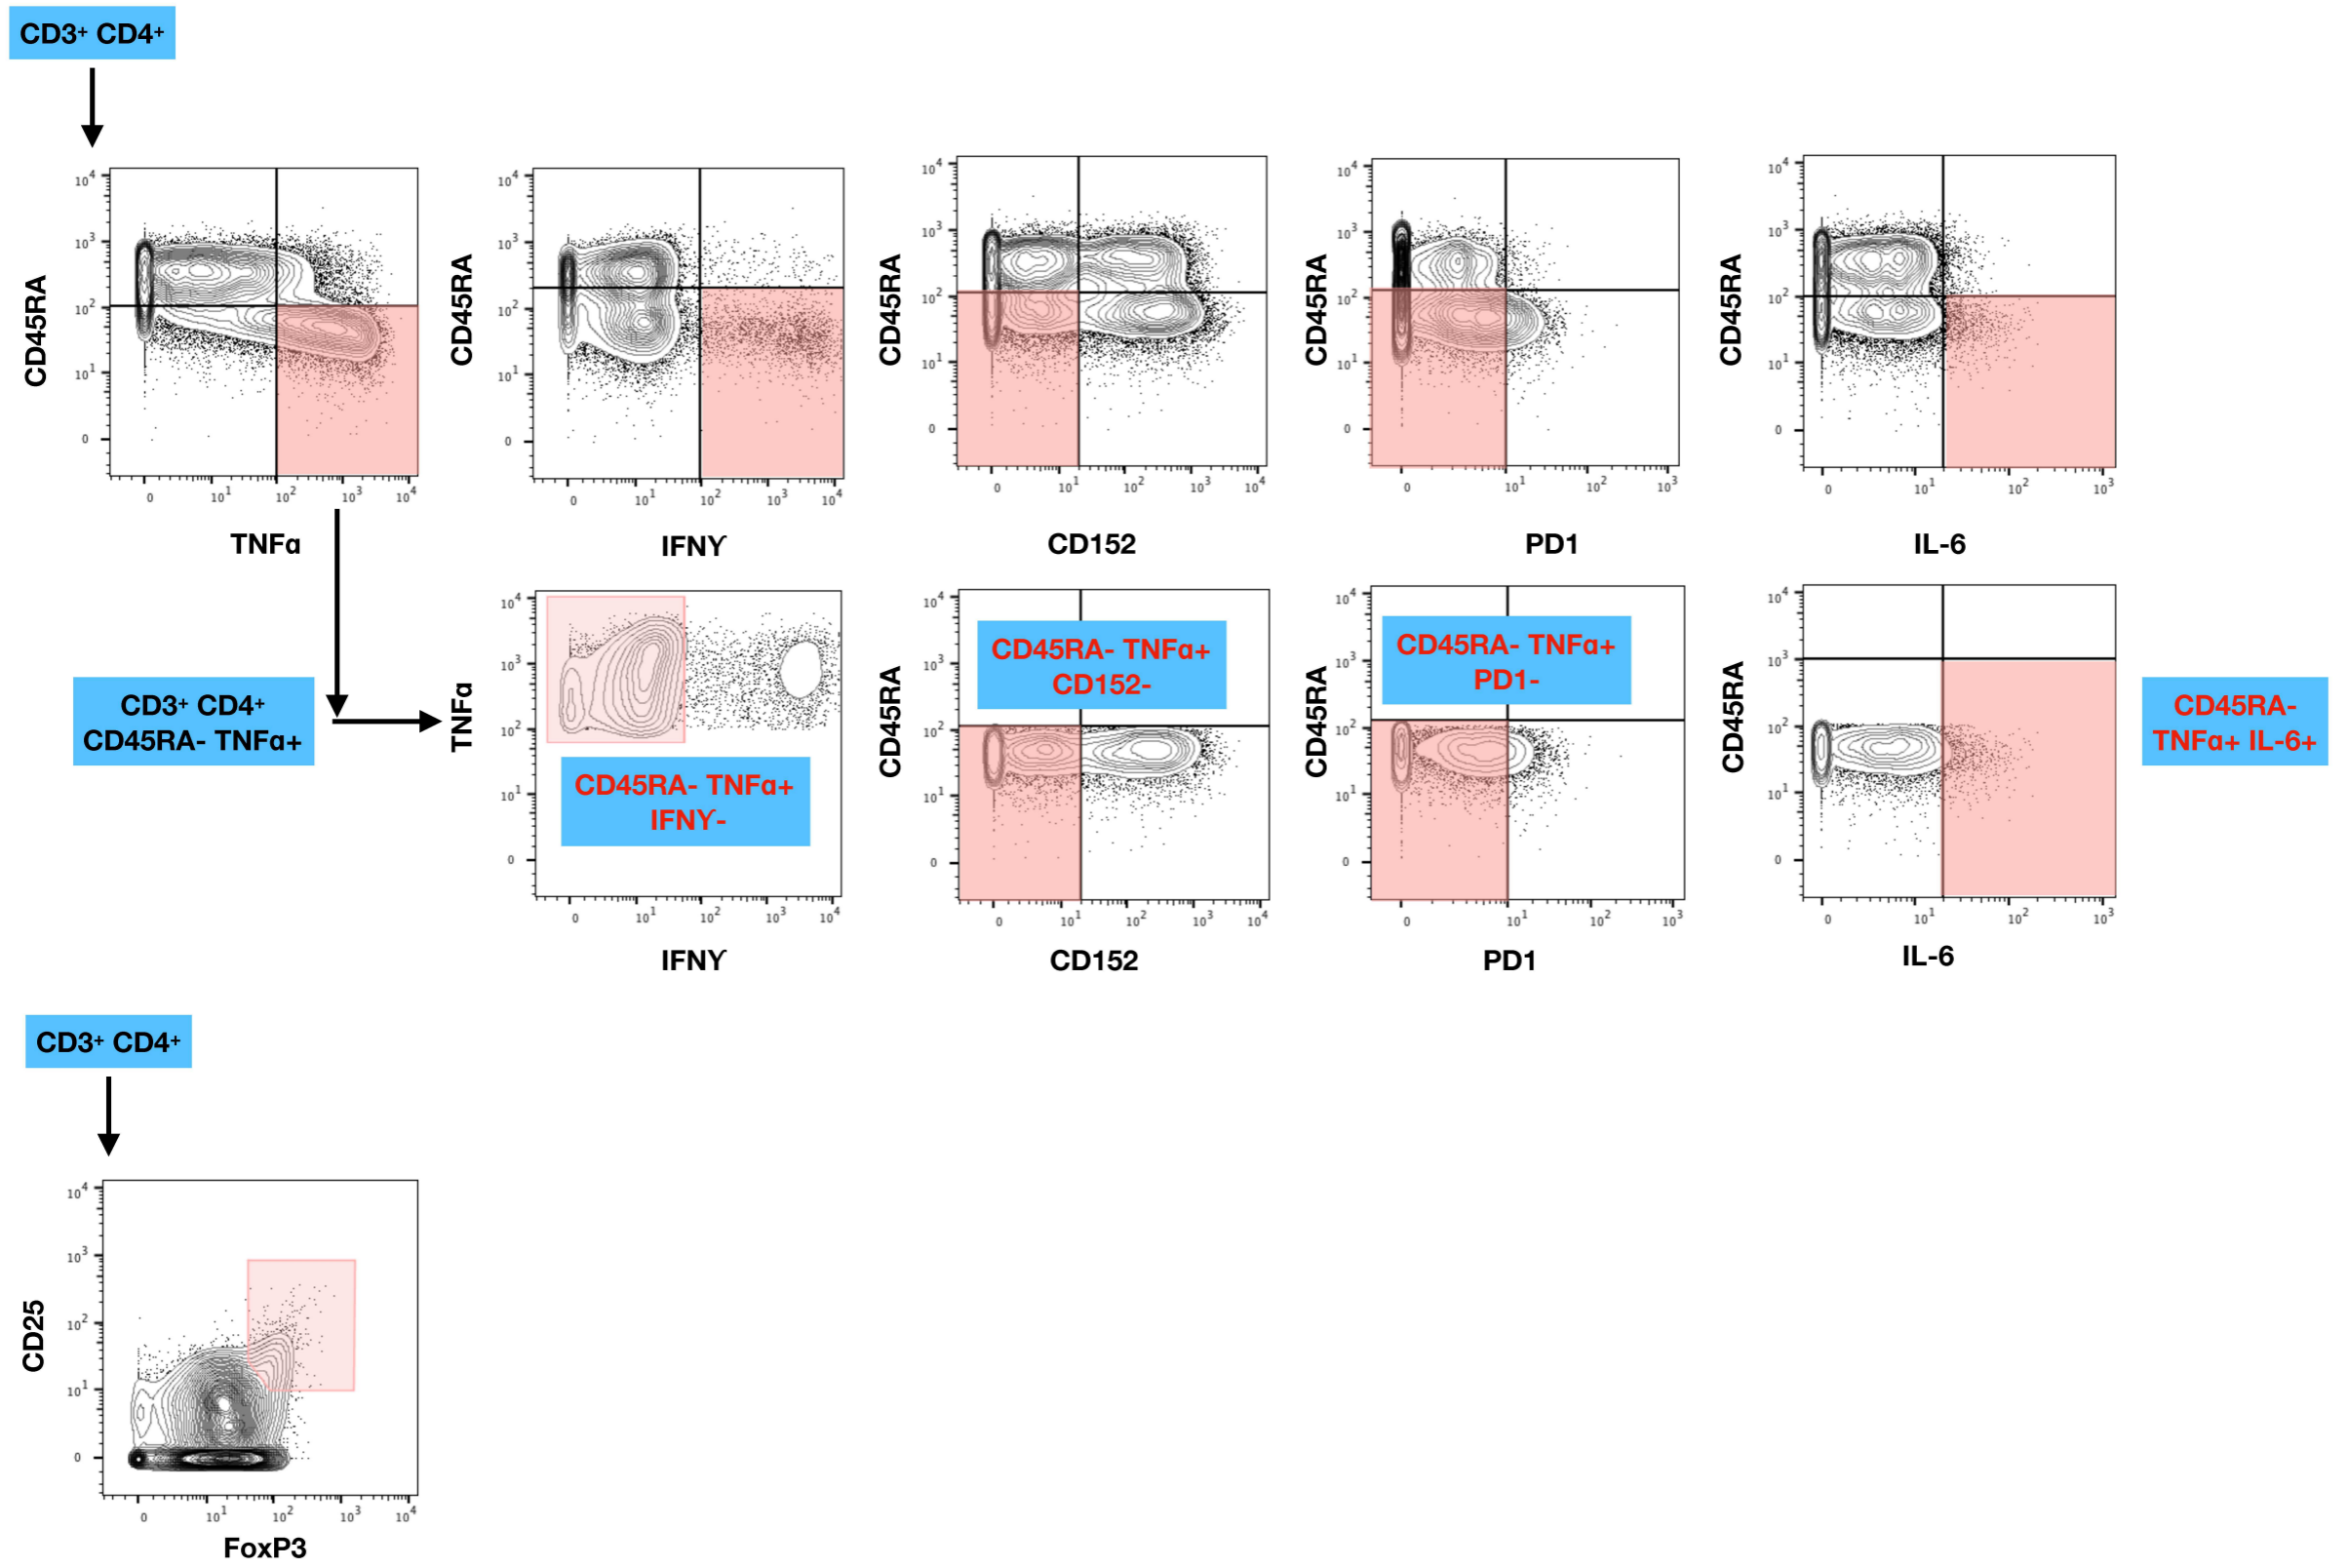

## Supplementary Figure S5

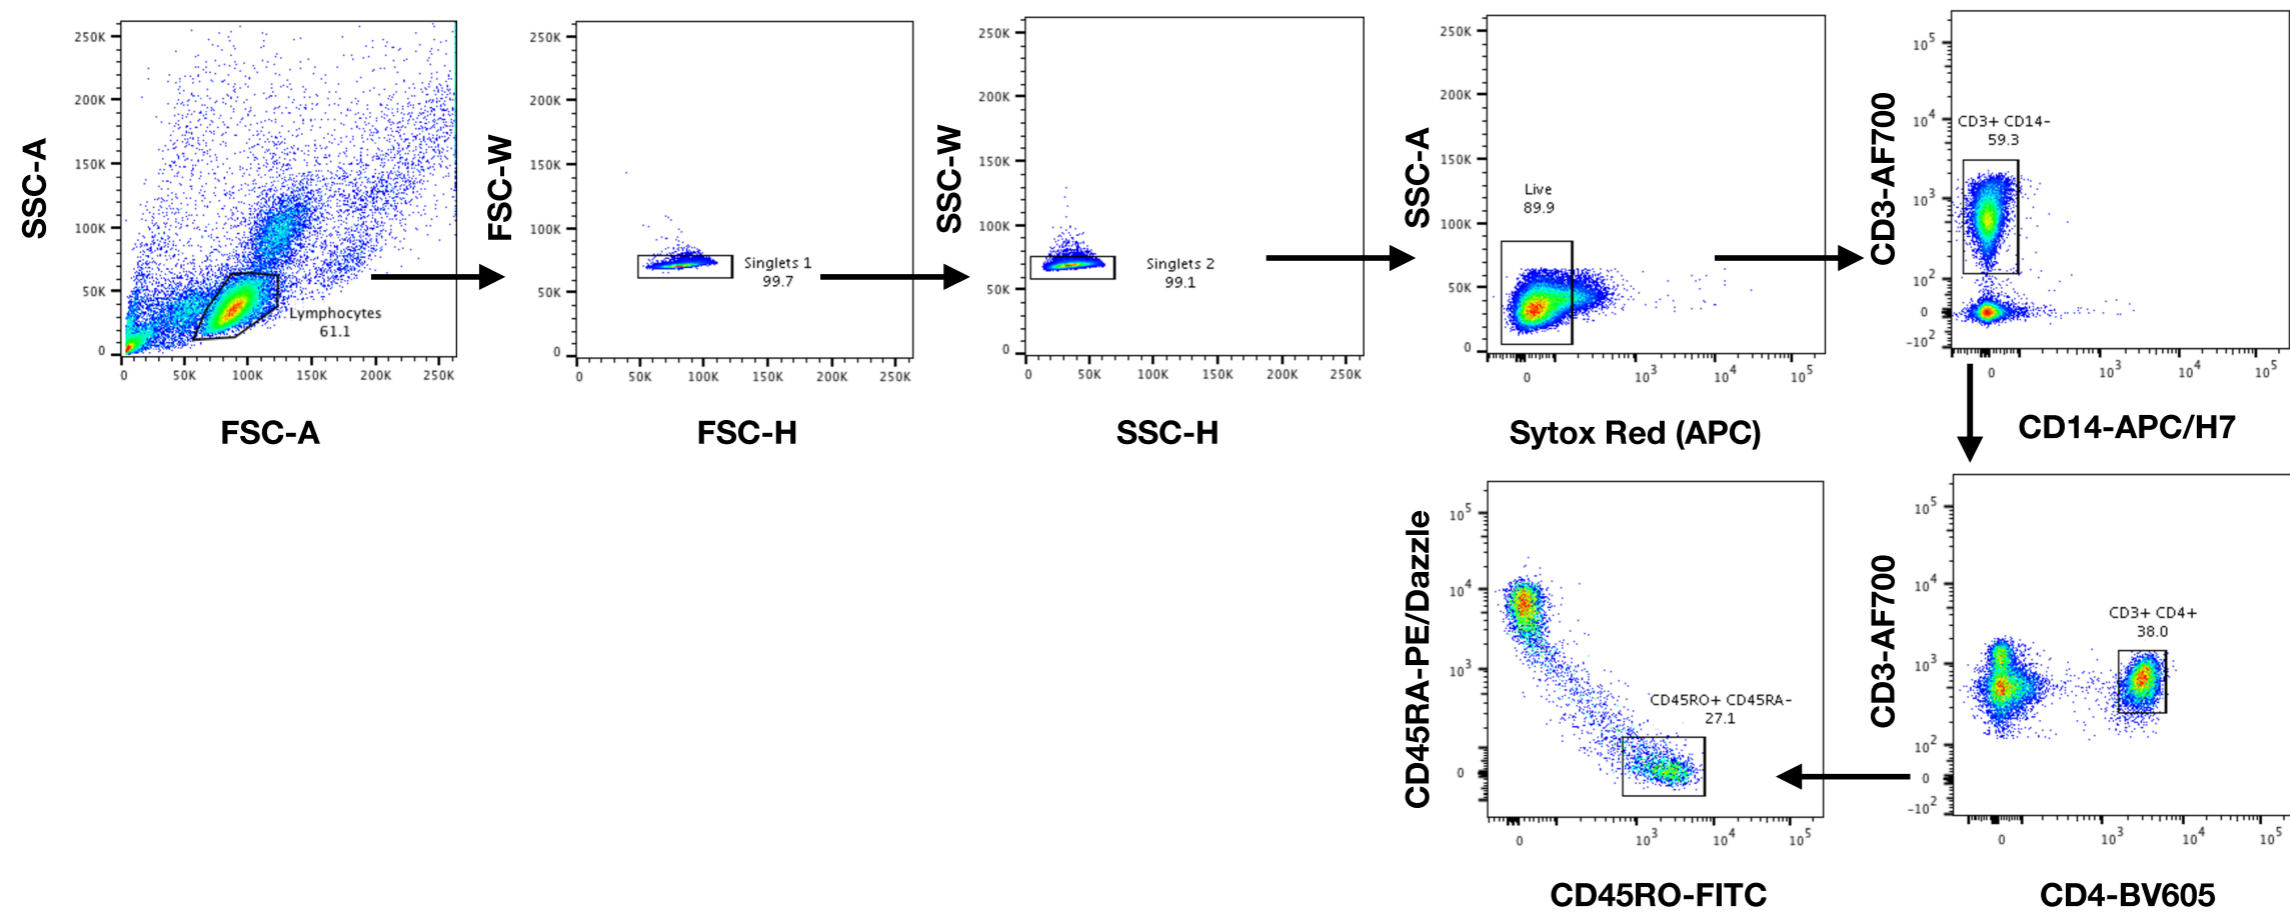

## Supplementary Figure S6

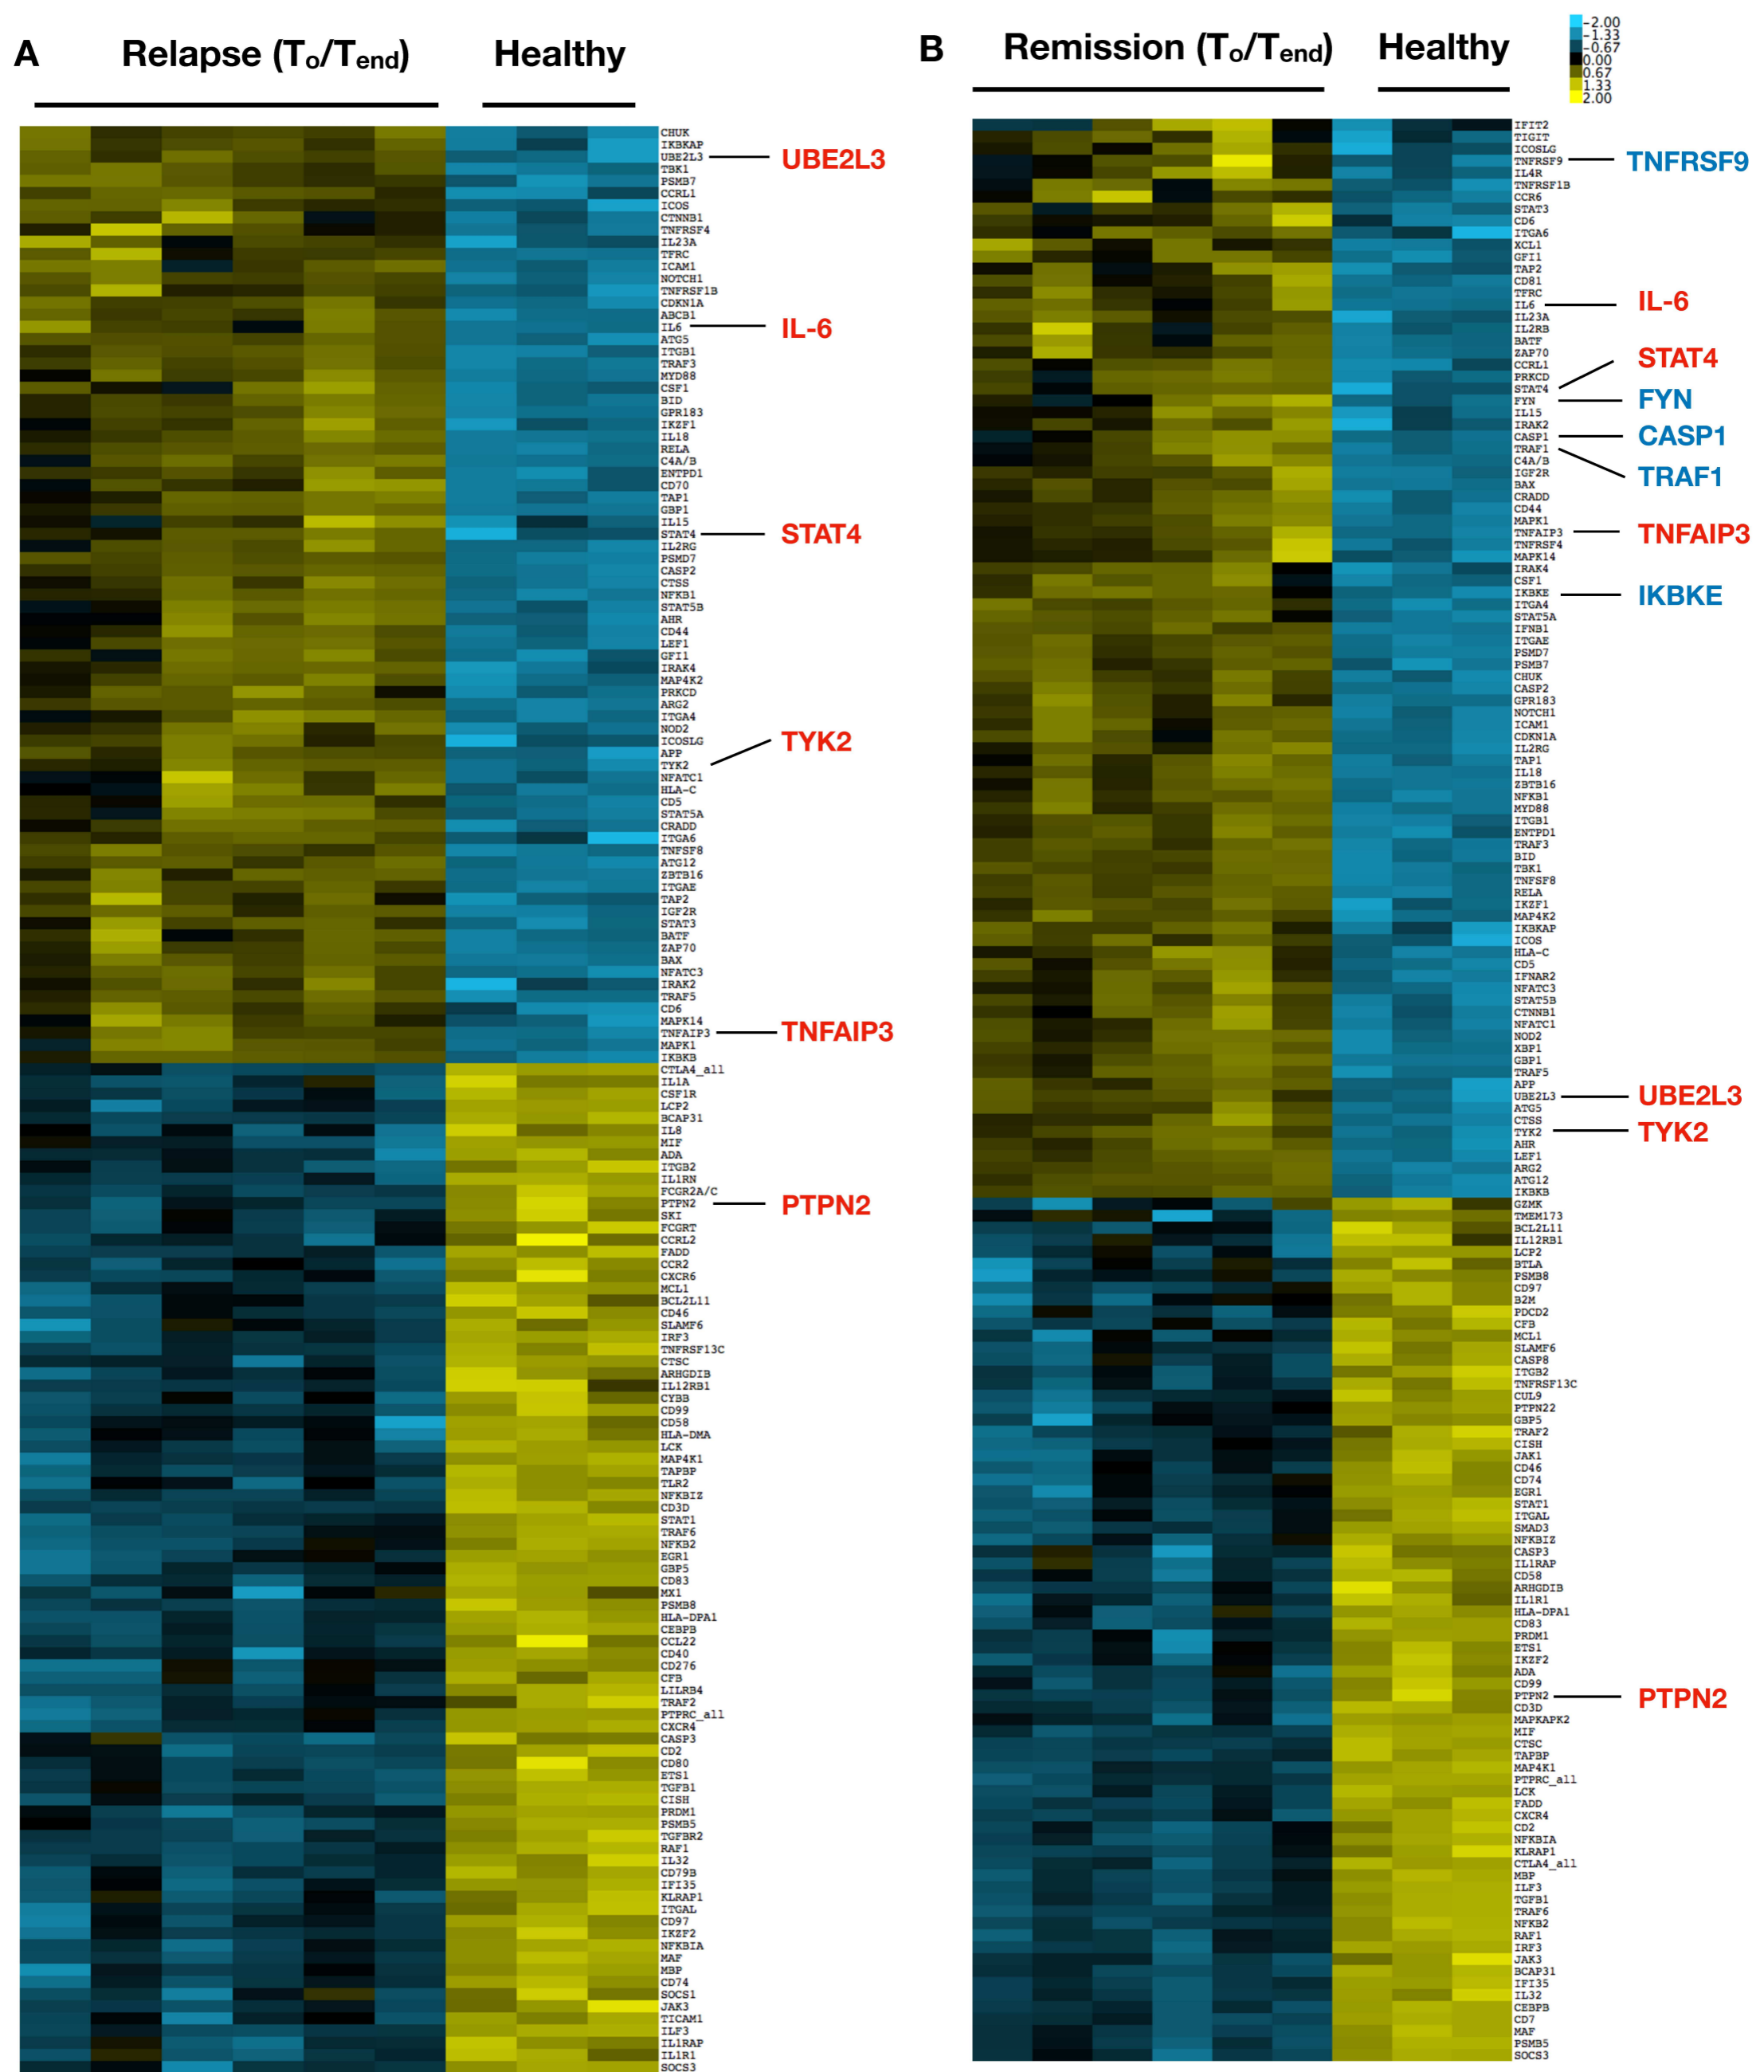

Supplementary Figure S7

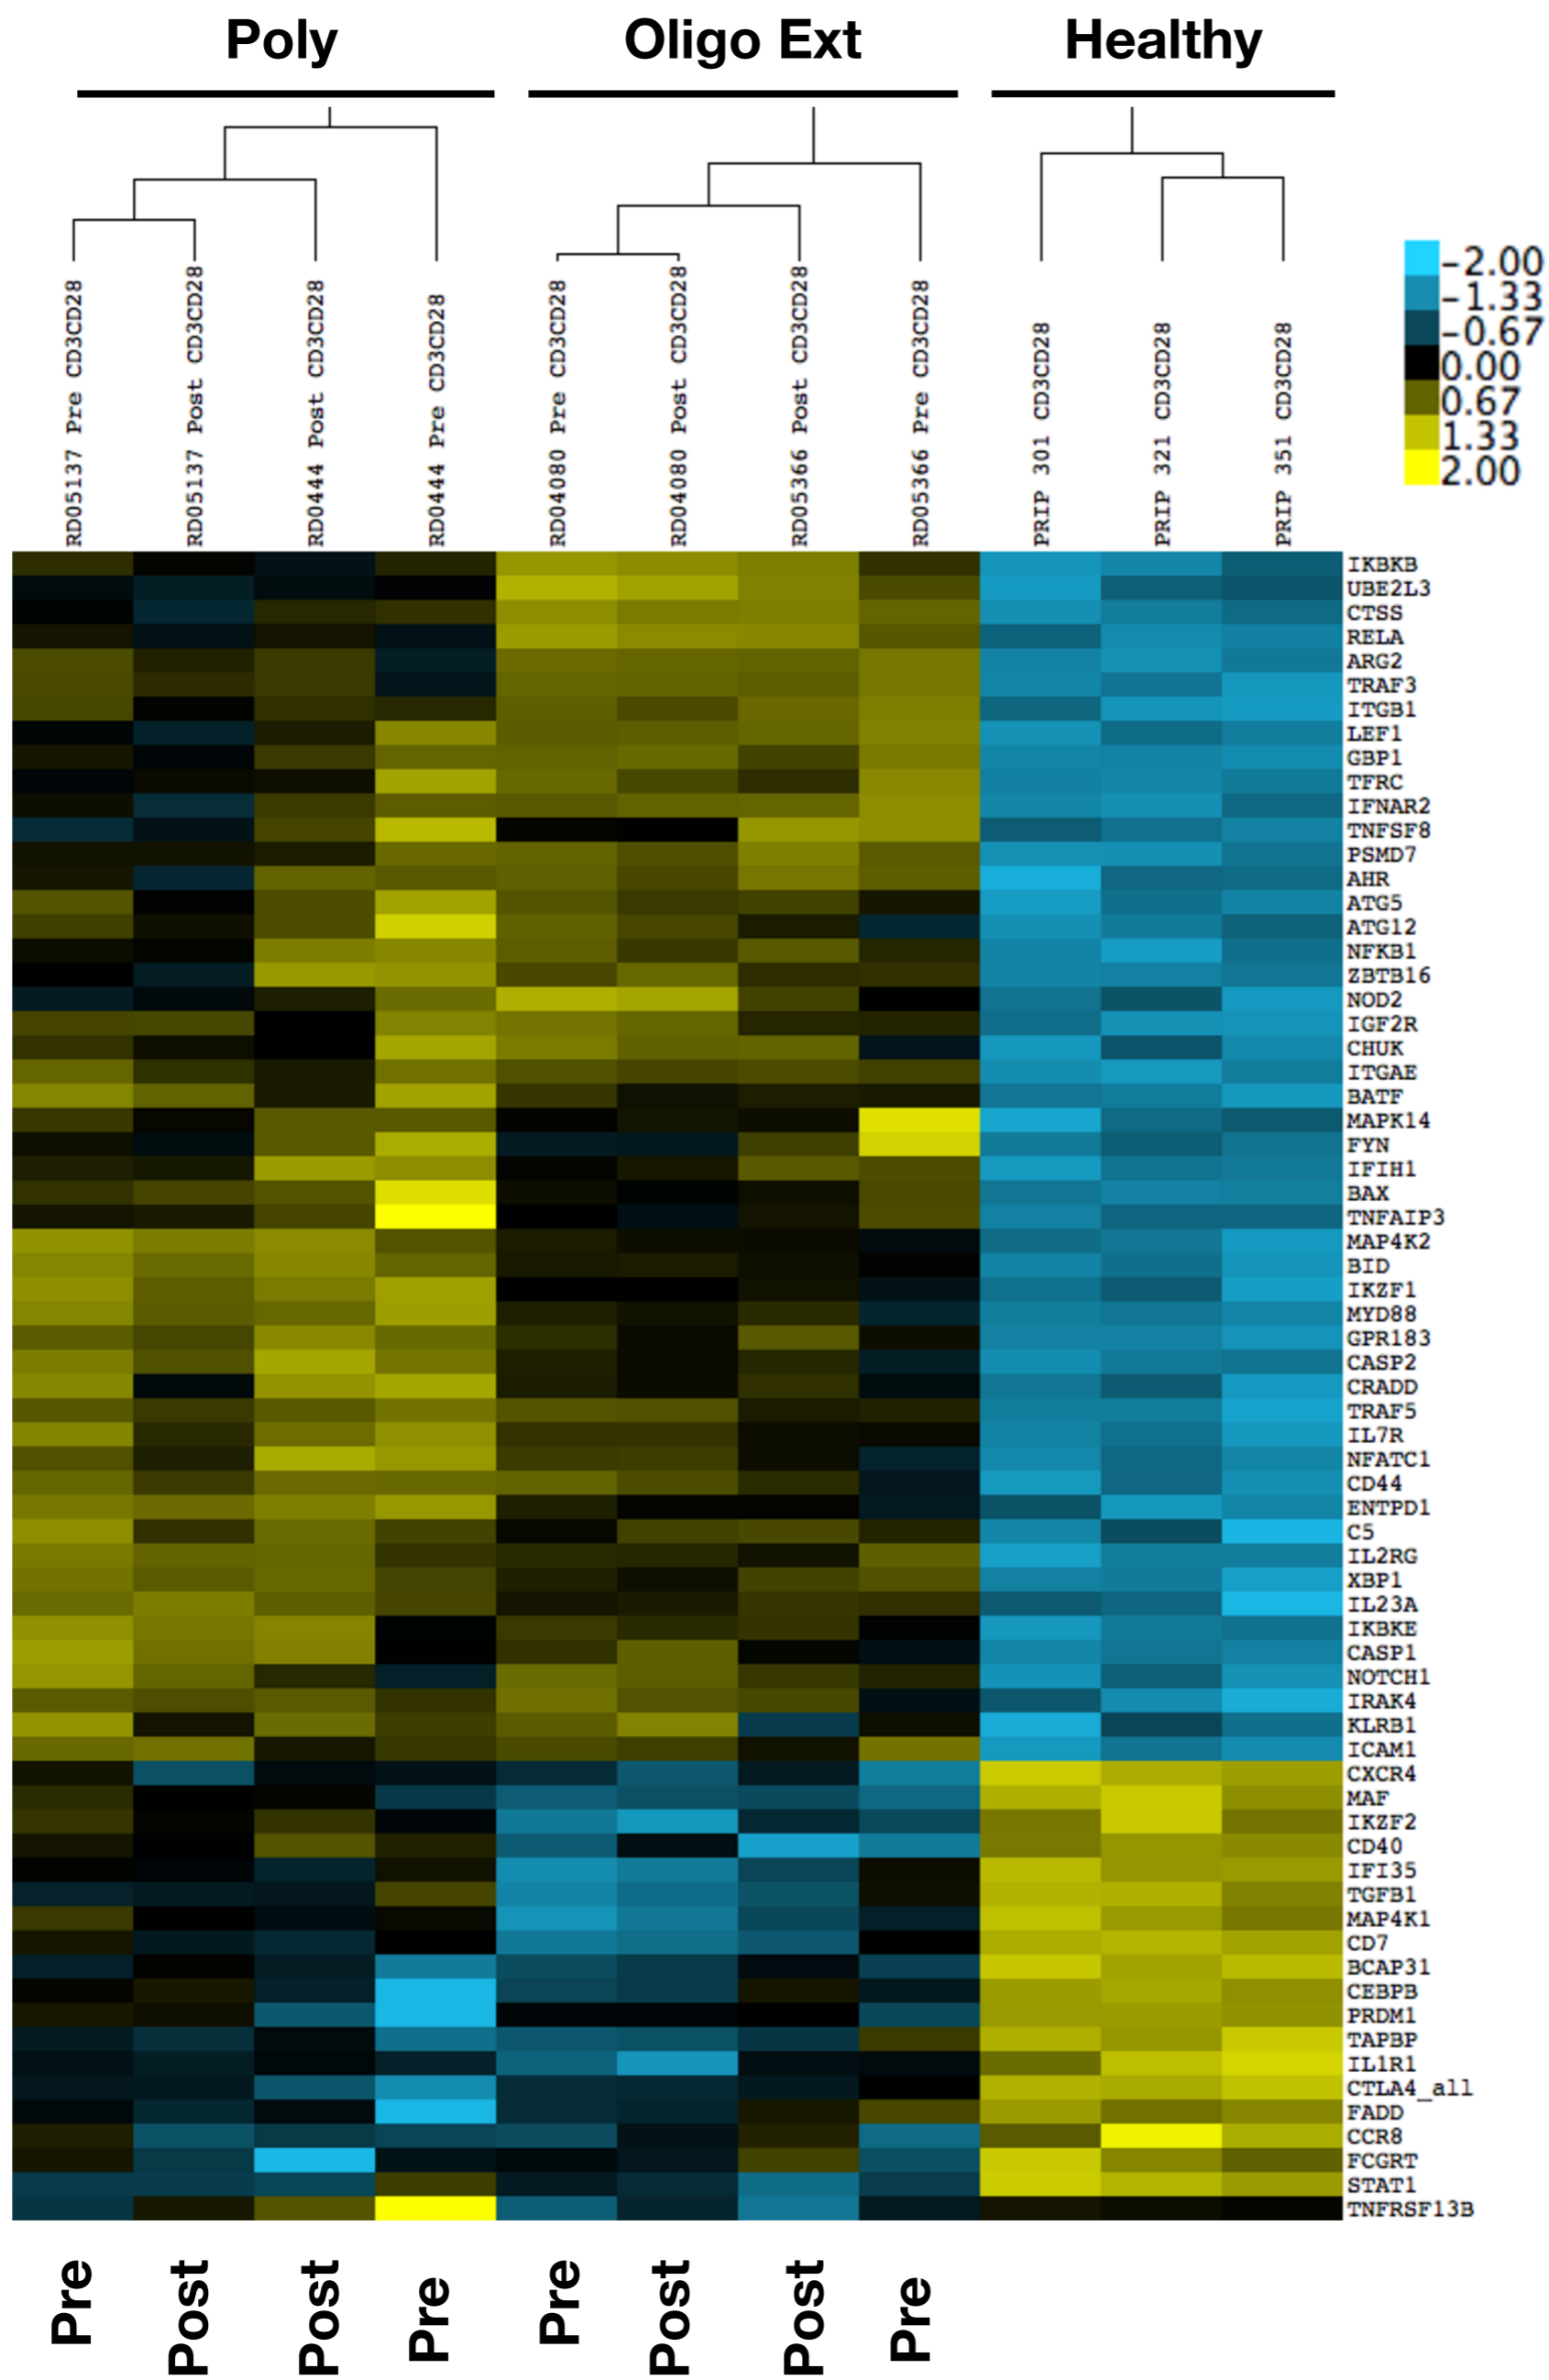

## Supplementary Figure S8

**A** TCR activation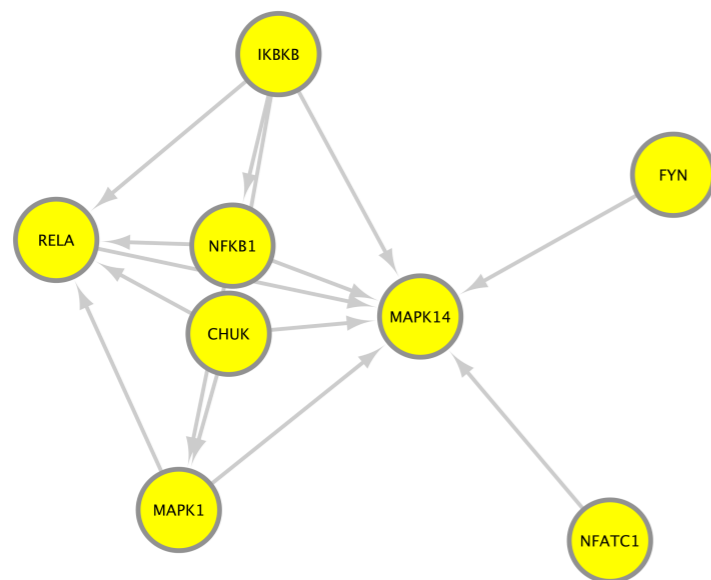**B** TNF $\alpha$  Signalling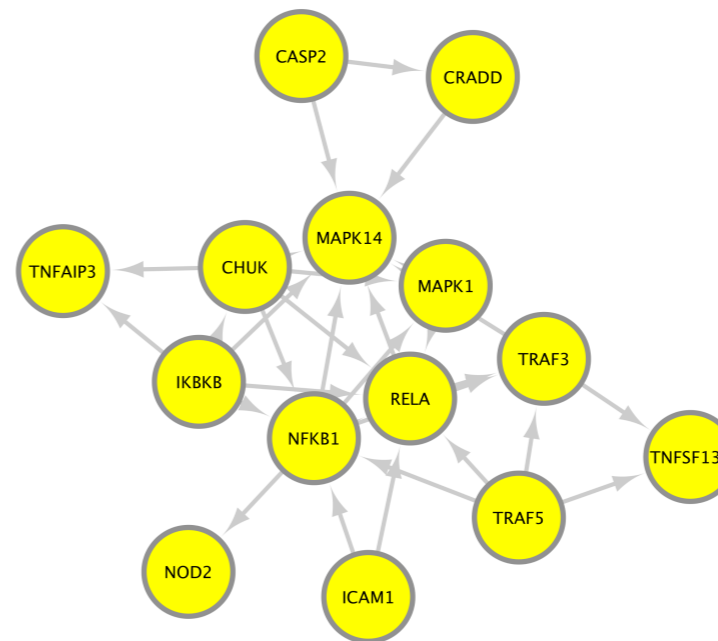**C** NF- $\kappa$ B Signalling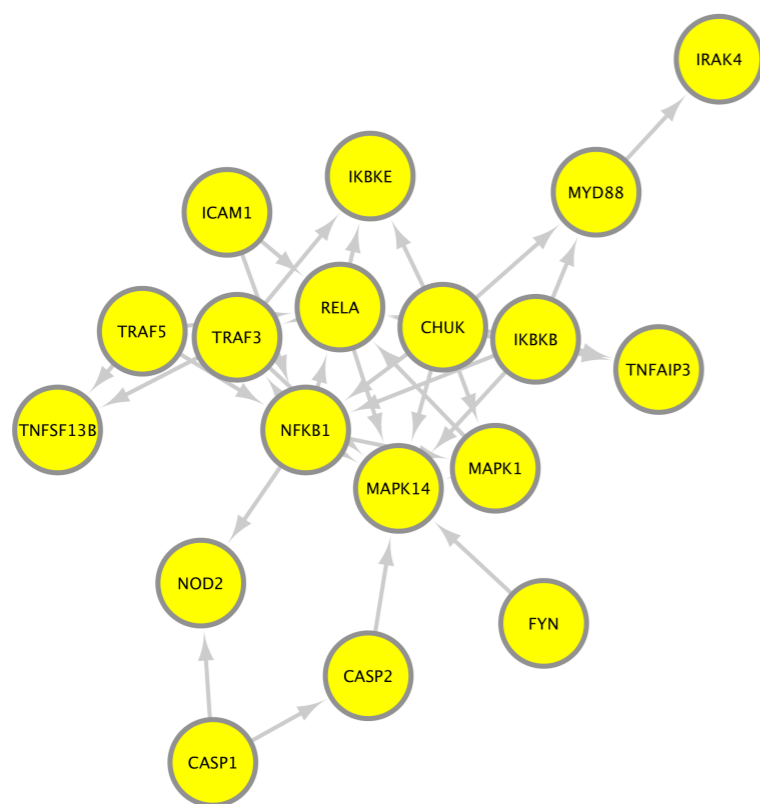**D** Apoptosis Signalling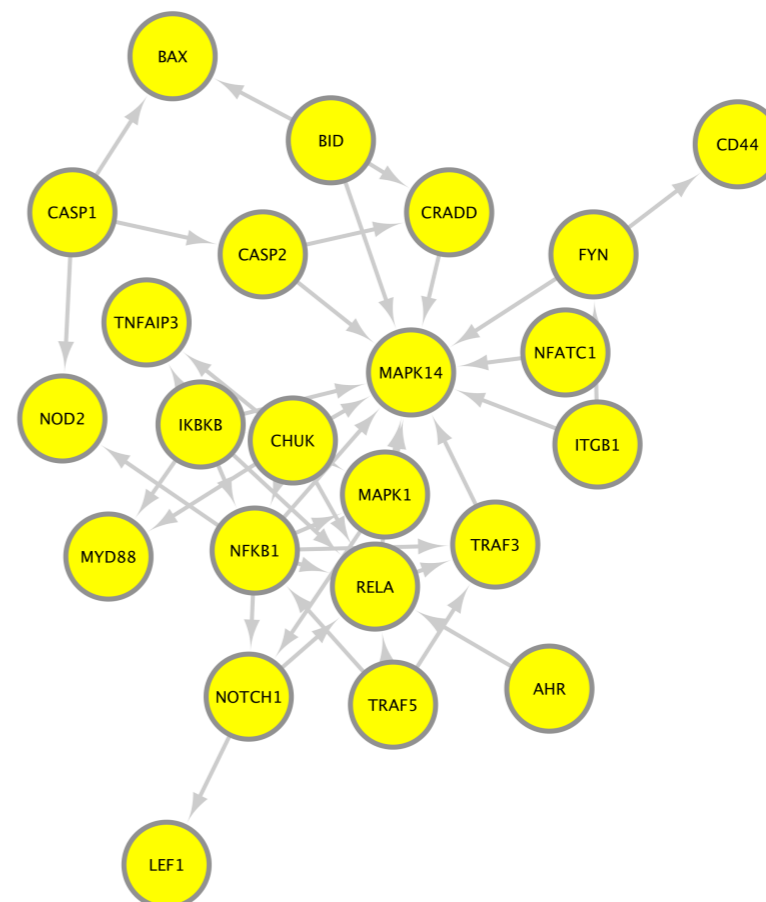**E** MAPK Signalling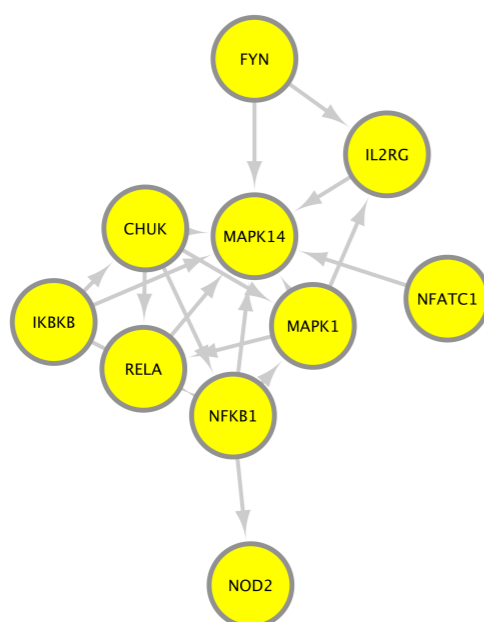



Supplementary Figure S9

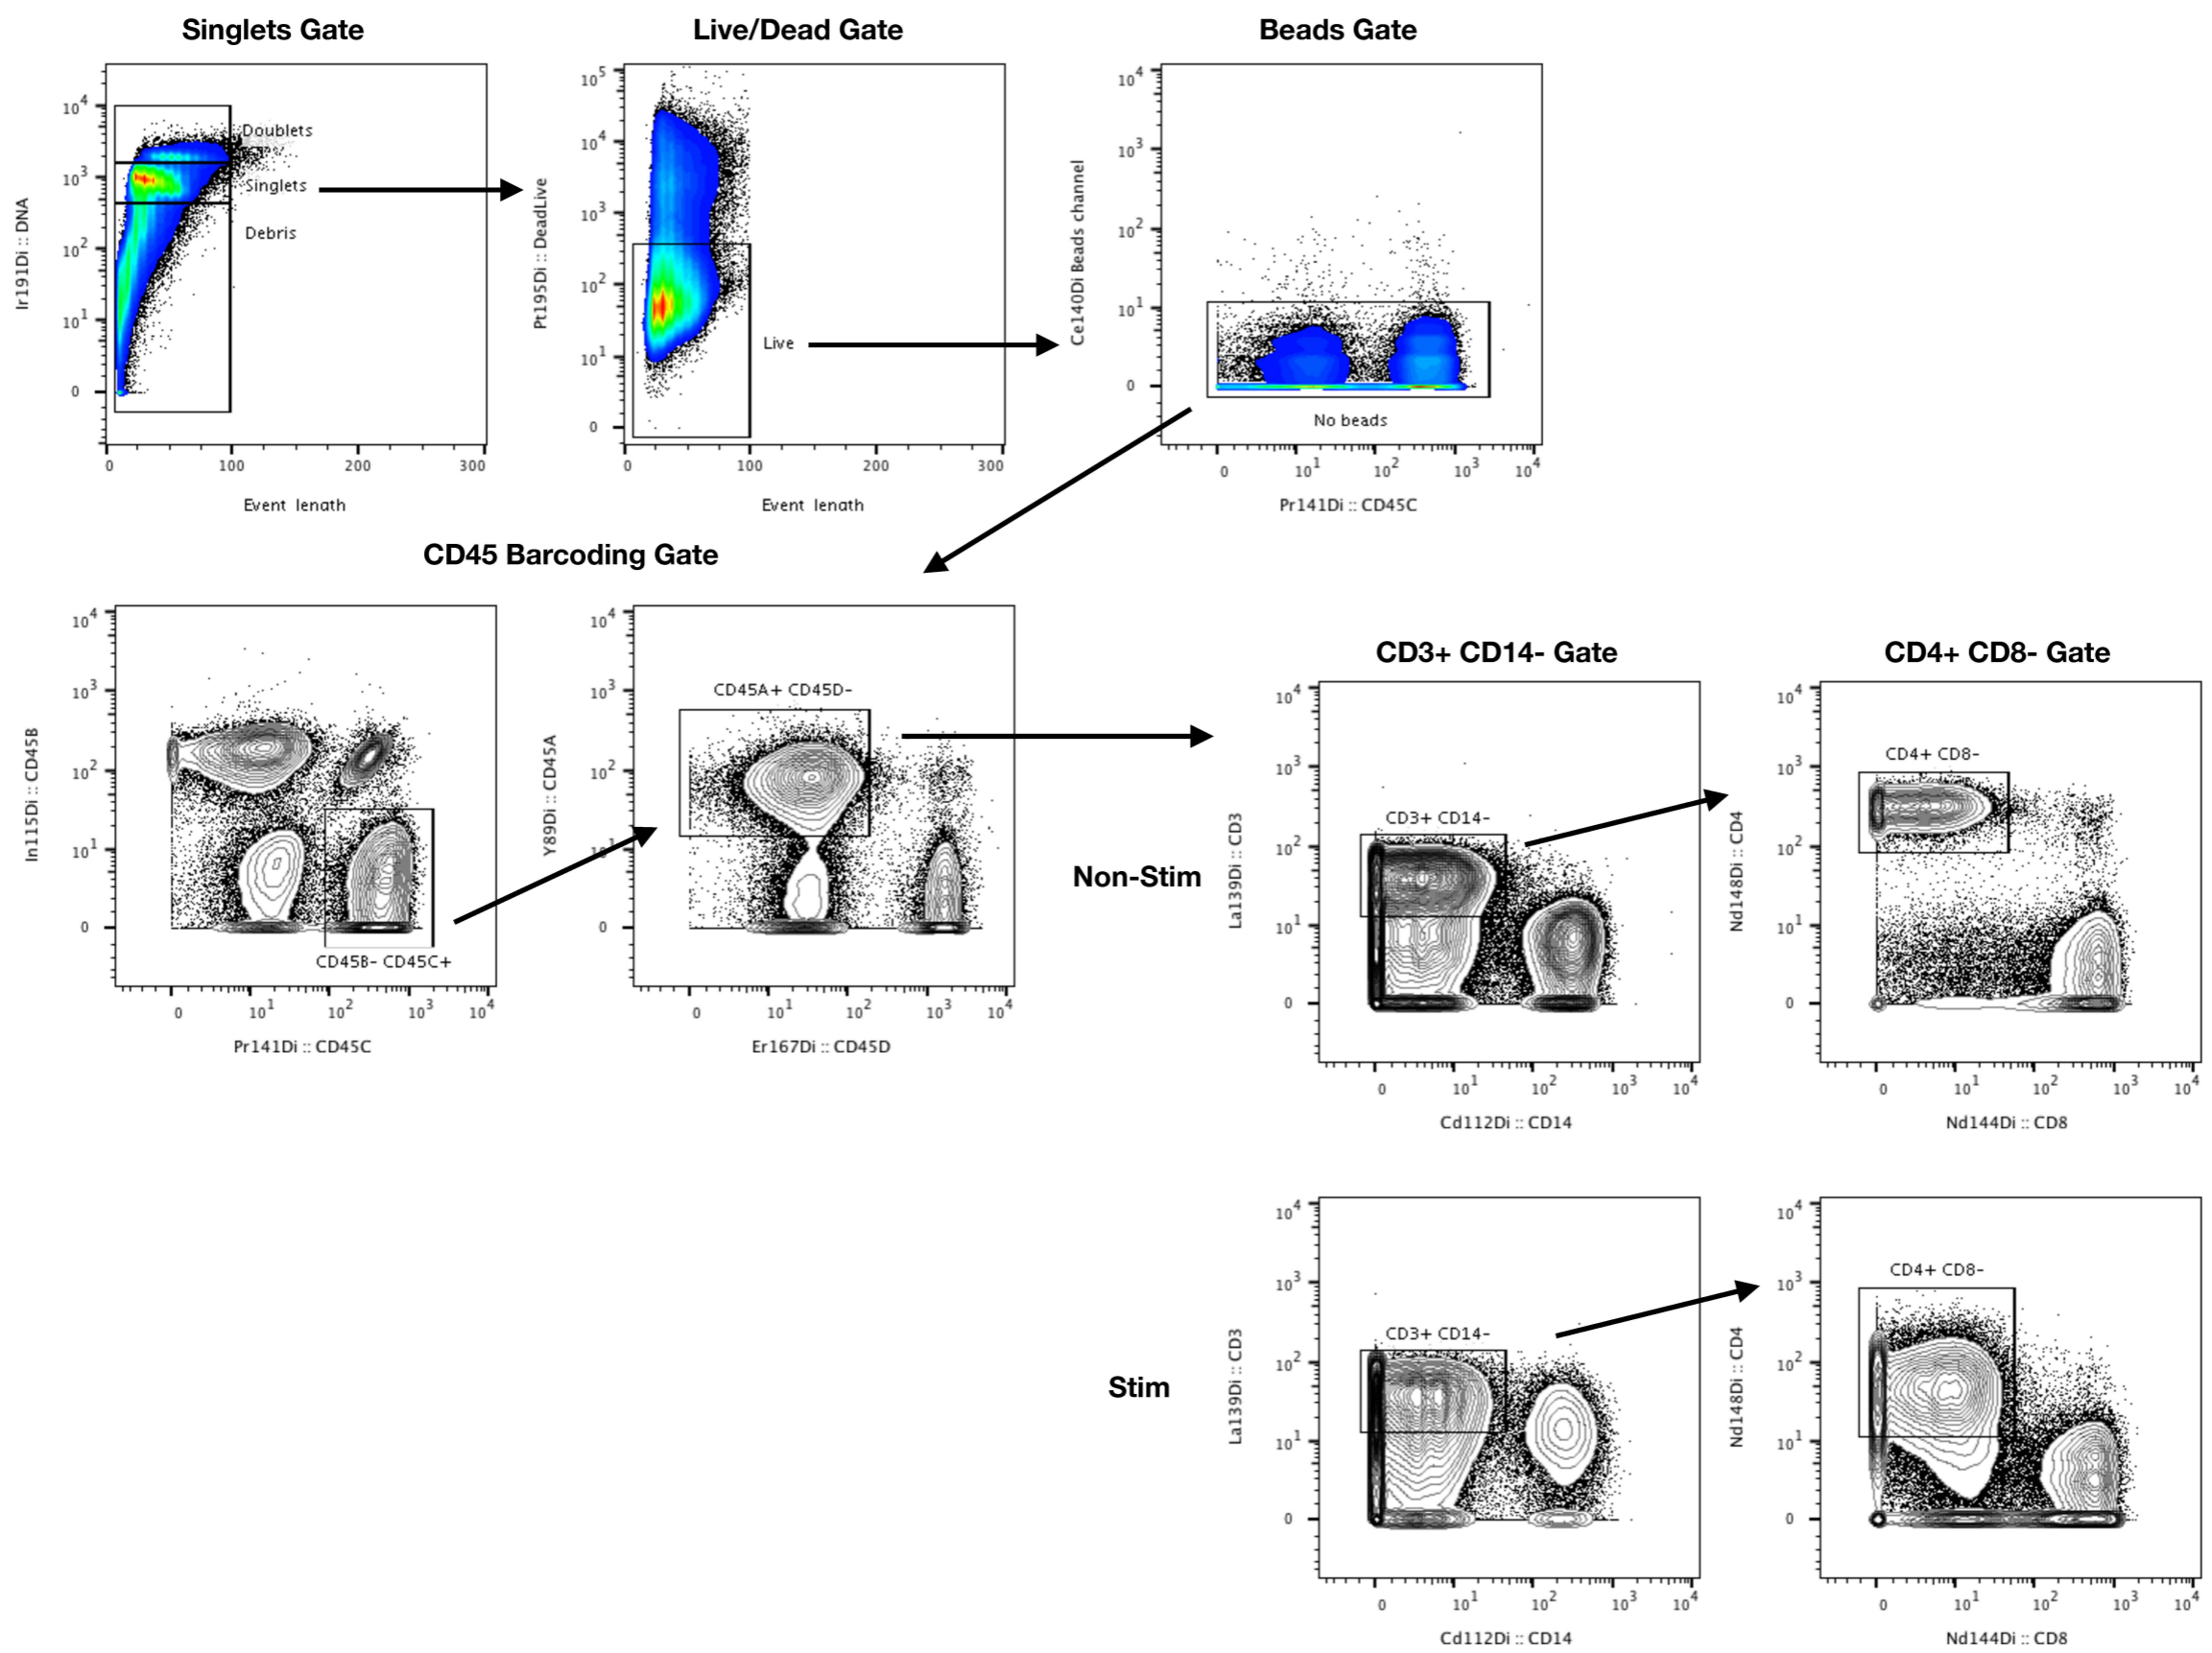

Supplement: annrheumdis-2019-216059supp001.pdf [file annrheumdis-2019-216059supp001.pdf]
