# Supplementary material for: Immunome perturbation is present in patients with juvenile idiopathic arthritis who are in remission and will relapse upon anti-TNFα withdrawal
Source: PubMed Central journal article supplement (PMC6900250; doi:10.1136/annrheumdis-2019-216059), 2019-09-20
Supplement: annrheumdis-2019-216059supp002.pdf [file annrheumdis-2019-216059supp002.pdf]

## Supplementary Table S1

| No. | Individuals                       | JIA Subtype | Gender | Medication History  | CyToF | Nanostring |
|-----|-----------------------------------|-------------|--------|---------------------|-------|------------|
| 1   | Relapse 1011 (T <sub>o</sub> )    | Poly RF -   | F      | etanercept, no MTX  | ✓     |            |
| 2   | Relapse 1044 (T <sub>o</sub> )    | Poly RF -   | F      | etanercept, no MTX  | ✓     |            |
| 3   | Relapse 2020 (T <sub>o</sub> )    | Poly RF -   | F      | adalimumab, no MTX  | ✓     |            |
| 4   | Relapse 2042 (T <sub>o</sub> )    | Poly RF -   | F      | etanercept, no MTX  | ✓     |            |
| 5   | Relapse 4090 (T <sub>o</sub> )    | Poly RF -   | F      | etanercept, no MTX  | ✓     |            |
| 6   | Relapse 5031 (T <sub>o</sub> )    | Poly RF -   | F      | adalimumab, yes MTX | ✓     |            |
| 7   | Relapse 6129 (T <sub>o</sub> )    | Poly RF -   | F      | adalimumab, no MTX  | ✓     |            |
| 8   | Relapse 7063 (T <sub>o</sub> )    | Poly RF -   | F      | etanercept, yes MTX | ✓     |            |
| 9   | Relapse 8120 (T <sub>o</sub> )    | Poly RF -   | F      | etanercept, no MTX  | ✓     |            |
| 10  | Relapse 5137 (T <sub>o</sub> )    | Poly RF -   | M      | infliximab, yes MTX |       | ✓          |
| 11  | Relapse 10107 (T <sub>o</sub> )   | Poly RF -   | F      | etanercept, no MTX  |       | ✓          |
| 12  | Relapse 1006 (T <sub>o</sub> )    | Poly RF -   | F      | etanercept, no MTX  |       | ✓          |
|     |                                   |             |        |                     |       |            |
| 1   | Relapse 1001 (T <sub>end</sub> )  | Poly RF -   | F      | etanercept, no MTX  | ✓     |            |
| 2   | Relapse 1003 (T <sub>end</sub> )  | Poly RF -   | F      | etanercept, yes MTX | ✓     |            |
| 3   | Relapse 1006 (T <sub>end</sub> )  | Poly RF -   | F      | etanercept, no MTX  | ✓     |            |
| 4   | Relapse 1011 (T <sub>end</sub> )  | Poly RF -   | F      | etanercept, no MTX  | ✓     |            |
| 5   | Relapse 1044 (T <sub>end</sub> )  | Poly RF -   | F      | etanercept, no MTX  | ✓     |            |
| 6   | Relapse 3066 (T <sub>end</sub> )  | Poly RF -   | F      | etanercept, no MTX  | ✓     |            |
| 7   | Relapse 6049 (T <sub>end</sub> )  | Poly RF -   | F      | etanercept, no MTX  | ✓     | ✓          |
| 8   | Relapse 7063 (T <sub>end</sub> )  | Poly RF -   | F      | etanercept, yes MTX | ✓     |            |
| 9   | Relapse 10107 (T <sub>end</sub> ) | Poly RF -   | F      | etanercept, no MTX  | ✓     |            |
| 10  | Relapse 3062 (T <sub>end</sub> )  | Poly RF -   | M      | infliximab, yes MTX |       | ✓          |
| 11  | Relapse 6048 (T <sub>end</sub> )  | Poly RF -   | F      | etanercept, yes MTX |       | ✓          |

| No. | Individuals                         | JIA Subtype | Gender | Medication History  | CyToF | Nanostring |
|-----|-------------------------------------|-------------|--------|---------------------|-------|------------|
| 1   | Remission 1018 (T <sub>o</sub> )    | Poly RF -   | F      | etanercept, no MTX  | ✓     |            |
| 2   | Remission 1034 (T <sub>o</sub> )    | Poly RF -   | M      | etanercept, no MTX  | ✓     |            |
| 3   | Remission 1124 (T <sub>o</sub> )    | Poly RF -   | F      | etanercept, no MTX  | ✓     |            |
| 4   | Remission 2022 (T <sub>o</sub> )    | Poly RF +   | F      | etanercept, yes MTX | ✓     | ✓          |
| 5   | Remission 2114 (T <sub>o</sub> )    | Poly RF -   | F      | etanercept, no MTX  | ✓     |            |
| 6   | Remission 4014 (T <sub>o</sub> )    | Poly RF -   | F      | etanercept, no MTX  | ✓     |            |
| 7   | Remission 5121 (T <sub>o</sub> )    | Poly RF -   | M      | etanercept, yes MTX | ✓     |            |
| 8   | Remission 6128 (T <sub>o</sub> )    | Poly RF -   | M      | etanercept, yes MTX | ✓     |            |
| 9   | Remission 7056 (T <sub>o</sub> )    | Poly RF -   | F      | etanercept, no MTX  | ✓     |            |
| 10  | Remission 8130 (T <sub>o</sub> )    | Poly RF -   | F      | adalimumab, yes MTX | ✓     |            |
| 11  | Remission 15122 (T <sub>o</sub> )   | Poly RF +   | F      | etanercept, no MTX  | ✓     |            |
| 12  | Remission 5127 (T <sub>o</sub> )    | Poly RF -   | F      | etanercept, yes MTX |       | ✓          |
| 13  | Remission 4073 (T <sub>o</sub> )    | Poly RF +   | F      | adalimumab, no MTX  |       | ✓          |
|     |                                     |             |        |                     |       |            |
| 1   | Remission 2022 (T <sub>end</sub> )  | Poly RF +   | F      | etanercept, yes MTX | ✓     |            |
| 2   | Remission 5026 (T <sub>end</sub> )  | Poly RF -   | M      | etanercept, yes MTX | ✓     |            |
| 3   | Remission 8054 (T <sub>end</sub> )  | Poly RF -   | F      | etanercept, no MTX  | ✓     |            |
| 4   | Remission 8131 (T <sub>end</sub> )  | Poly RF -   | M      | etanercept, no MTX  | ✓     |            |
| 5   | Remission 9086 (T <sub>end</sub> )  | Poly RF -   | F      | etanercept, no MTX  | ✓     | ✓          |
| 6   | Remission 9098 (T <sub>end</sub> )  | Poly RF -   | F      | etanercept, no MTX  | ✓     |            |
| 7   | Remission 16111 (T <sub>end</sub> ) | Poly RF +   | F      | etanercept, yes MTX | ✓     |            |
| 8   | Remission 10081 (T <sub>end</sub> ) | Poly RF +   | M      | etanercept, yes MTX |       | ✓          |
| 9   | Remission 3103 (T <sub>end</sub> )  | Poly RF +   | F      | adalimumab, no MTX  |       | ✓          |

|                               |                | Relapse               |                         | Remission             |                        | Healthy |
|-------------------------------|----------------|-----------------------|-------------------------|-----------------------|------------------------|---------|
|                               |                | T <sub>o</sub> (n=12) | T <sub>end</sub> (n=11) | T <sub>o</sub> (n=13) | T <sub>end</sub> (n=9) | n= 69   |
| Anti-TNFα<br>Biologics        | etanercept (%) | 8 (66.7%)             | 10 (90.9%)              | 11 (84.6%)            | 9 (100%)               | N.A.    |
|                               | adalimumab (%) | 3 (25%)               | 0 (0%)                  | 2 (15.4%)             | 0 (0%)                 | N.A.    |
|                               | infliximab (%) | 1 (8.33%)             | 1 (9.1%)                | 0 (0%)                | 0 (0%)                 | N.A.    |
| Methotrexate (concurrent) (%) |                | 3 (25%)               | 4 (36.4%)               | 5 (38.5%)             | 4 (44.4%)              | N.A.    |
| Rheumatoid Factor*            |                | 0 (0%)                | 0                       | 3 (23.1%)             | 4 (44.4%)              | N.A.    |
| Average age (yrs) ± Std Dev   |                | 14.2 ± 4.2            | 12.5 ± 5.1              | 9.0 ± 3.4             | 12.6 ± 4.2             | 9 ± 3   |
| Female (n): Male (n)          |                | 11:1                  | 10:1                    | 10:3                  | 6:3                    | 10:59   |

## Supplementary Table S2

| Patient ID      | Date     | Disease             | age  | Disease Duration (yrs) | Gender | Joints | ESR      | CRP      | Medication history                        |
|-----------------|----------|---------------------|------|------------------------|--------|--------|----------|----------|-------------------------------------------|
| RD00444<br>Pre  | 25/7/16  | Poly JIA, RF+       | 16.5 | 11.8                   | F      | 5      | Not done | Not done | Sulfasalazine, MTX, Folic acid, HCQ       |
| RD00444<br>Post | 10/2/17  | Poly JIA, RF+       | 17.0 | 12.4                   | F      | 0      | 48       | 2        | MTX, Folic acid, <b>Enbrel</b>            |
| RD05137<br>Pre  | 11/3/16  | Poly JIA, RF+       | 10.9 | 0.1                    | F      | 4      | 26       | 1.5      | -                                         |
| RD05137<br>Post | 15/9/16  | Poly JIA, RF+       | 11.4 | 0.6                    | F      | 0      | 7        | <0.2     | <b>Enbrel</b> , MTX, Folic acid           |
| RD04080<br>Pre  | 13/4/16  | Oligo JIA, Extended | 13.6 | 2.4                    | F      | 4      | 47       | 18.2     | MTX, Prednisolone, Omeprazole, Folic acid |
| RD04080<br>Post | 26/10/16 | Oligo JIA, Extended | 14.1 | 2.9                    | F      | 0      | 21       | 5.7      | MTX, Folic acid, <b>Enbrel</b>            |
| RD05336<br>Pre  | 4/8/16   | Oligo JIA, Extended | 1.9  | 0.1                    | F      | 8      | 97       | 49.3     | Brufen                                    |
| RD05336<br>Post | 10/2/17  | Oligo JIA, Extended | 2.4  | 0.6                    | F      | 0      | 8        | 0.4      | <b>Enbrel</b>                             |

## Supplementary Table S3

| Targets                    | Metal Channel | Staining      | Clone    | Antibody Vendor/Catalogue number           |
|----------------------------|---------------|---------------|----------|--------------------------------------------|
| <b>Lineage markers</b>     |               |               |          |                                            |
| CD3                        | 139           | Surface/Intra | UCHT1    | Biologend (300402)                         |
| CD4                        | 148           | Surface/Intra | SK3      | Biologend (344625)                         |
| CD8                        | 144           | Surface       | SK1      | Biologend (344727)                         |
| CD11b                      | 161           | Surface       | ICRF44   | Biologend (301302)                         |
| CD16                       | 209           | Surface       | 3G8      | Fluidigm (3209002B)                        |
| CD14                       | 112/114       | Surface       | TuK4     | Thermofisher/Invitrogen (Q10064)           |
| <b>T helper subsets</b>    |               |               |          |                                            |
| IL-4                       | 156           | Intra         | 8D4-8    | Biologend (500707)                         |
| IFN-g                      | 168           | Intra         | B27      | Biologend (506513)                         |
| IL-17A                     | 169           | Intra         | BL168    | Biologend (512302)                         |
| IL-21                      | 151           | Intra         | 3A4-N2   | Biologend (513009)                         |
| CD161                      | 157           | Surface       | HP-3G10  | Biologend (339902)                         |
| <b>T cell functional</b>   |               |               |          |                                            |
| CD45RA                     | 171           | Surface       | HI100    | Biologend (304102)                         |
| CD69                       | 176           | Surface       | FN50     | Biologend (310902)                         |
| CD28                       | 146           | Surface       | CD28.2   | Biologend (302923)                         |
| CD152 (CTLA4)              | 155           | Intra         | BNI3     | Biologend (555851)                         |
| CD154 (CD40L)              | 149           | Surface       | 24-31    | Biologend (310835)                         |
| HLA-DR                     | 143           | Surface       | L243     | Biologend (307612)                         |
| LAG3                       | 159           | Surface       | 17B4     | Abcam (ab40466)                            |
| PD1                        | 147           | Surface       | EH12.2H7 | Biologend (329941)                         |
| Ki67                       | 166           | Intra         | 20Raj1   | Thermofisher/ebioscience (14-5699-82)      |
| ICOS                       | 154           | Surface       | C398.4A  | Biologend (313512)                         |
| CD31                       | 172           | Surface       | WM59     | Biologend (303102)                         |
| CD103                      | 142           | Surface       | B-Ly7    | Thermofisher/ebioscience (14-1038-82)      |
| <b>Chemokine receptors</b> |               |               |          |                                            |
| CXCR3                      | 163           | Surface       | G025H7   | Biologend (353718)                         |
| CXCR5                      | 160           | Surface       | RF8B2    | BD biosciences (552032)                    |
| CCR5                       | 145           | Surface       | NP-6G4   | Abcam (ab115738)                           |
| CCR6                       | 170           | Surface       | G034E3   | Biologend (353402)                         |
| <b>Treg markers</b>        |               |               |          |                                            |
| CD25                       | 150           | Surface       | M-A251   | BD biosciences (555429)                    |
| CD127                      | 153           | Surface       | A019D5   | Biologend (351302)                         |
| FoxP3                      | 165           | Intra         | PCH10L   | Thermofisher/ebioscience (14-4776-82)      |
| GITR                       | 164           | Surface       | 621      | Biologend (311602)                         |
| TGF-B (LAP)                | 175           | Surface/Intra | TW4-2F8  | Biologend (349602)                         |
| IL-10                      | 158           | Intra         | JES3-9D7 | Biologend (501402)                         |
| <b>Cytokines/Enzymes</b>   |               |               |          |                                            |
| TNF $\alpha$               | 152           | Intra         | Mab11    | Biologend (502902)                         |
| IL-6                       | 162           | Intra         | MQ2-13A5 | Thermofisher/ebioscience (16-7069-85)      |
| Granzyme B                 | 173           | Intra         | CLB-GB11 | Abcam (ab103159)                           |
| Perforin                   | 174           | Intra         | B-D48    | Abcam (ab47225)                            |
| <b>Barcodes</b>            |               |               |          |                                            |
| CD45-A                     | 89            | Surface       | HI30     | Fluidigm (3089003B)                        |
| CD45-B,C or D              | 115, 141, 167 | Surface       | HI30     | Biologend (304002)                         |
| <b>Live/Dead /Singlets</b> |               |               |          |                                            |
| DNA (Singlets)             | 191/193       | -             | Nil      | Fluidigm Cell-ID Intercalator-Ir (201192B) |
| Cisplatin (Live/Dead)      | 195           | -             | Nil      | Sigma-aldrich (479306-1G)                  |

## Supplementary Table S4

| Category                    | Term                                                                                                 | Count | %    | P-Value | Benjamin |
|-----------------------------|------------------------------------------------------------------------------------------------------|-------|------|---------|----------|
| <b>TCR activation</b>       |                                                                                                      |       |      |         |          |
| KEGG_PATHWAY                | <a href="#">T cell receptor signaling pathway</a>                                                    | 10    | 13.2 | 4.7E-07 | 3.9E-06  |
| GOTERM_BP_DIRECT            | <a href="#">T cell receptor signaling pathway</a>                                                    | 8     | 10.5 | 4.3E-06 | 3.5E-04  |
| REACTOME_PATHWAY            | <a href="#">R-HSA-202424 (Downstream TCR signaling)</a>                                              | 6     | 7.9  | 5.6E-04 | 9.4E-03  |
| BIOCARTA                    | <a href="#">T Cell Receptor Signaling Pathway</a>                                                    | 5     | 6.6  | 4.6E-02 | 2.4E-01  |
| <b>Apoptosis</b>            |                                                                                                      |       |      |         |          |
| UP_KEYWORDS                 | <a href="#">Apoptosis</a>                                                                            | 15    | 19.7 | 7.3E-09 | 2.6E-07  |
| GOTERM_BP_DIRECT            | <a href="#">apoptotic process</a>                                                                    | 14    | 18.4 | 1.2E-06 | 1.4E-04  |
| GOTERM_BP_DIRECT            | <a href="#">negative regulation of apoptotic process</a>                                             | 11    | 14.5 | 3.3E-05 | 1.8E-03  |
| GOTERM_BP_DIRECT            | <a href="#">positive regulation of apoptotic process</a>                                             | 10    | 13.2 | 7.4E-06 | 4.6E-04  |
| GOTERM_BP_DIRECT            | <a href="#">regulation of apoptotic process</a>                                                      | 9     | 11.8 | 4.8E-06 | 3.5E-04  |
| KEGG_PATHWAY                | <a href="#">Apoptosis</a>                                                                            | 6     | 7.9  | 2.9E-04 | 1.2E-03  |
| GOTERM_BP_DIRECT            | <a href="#">apoptotic signaling pathway</a>                                                          | 5     | 6.6  | 2.8E-04 | 9.7E-03  |
| GOTERM_BP_DIRECT            | <a href="#">activation of cysteine-type endopeptidase activity involved in apoptotic process</a>     | 4     | 5.3  | 6.1E-03 | 9.6E-02  |
| BIOCARTA                    | <a href="#">Neuropeptides VIP and PACAP inhibit the apoptosis of activated T cells</a>               | 4     | 5.3  | 4.6E-02 | 2.5E-01  |
| BIOCARTA                    | <a href="#">Induction of apoptosis through DR3 and DR4/5 Death Receptors</a>                         | 4     | 5.3  | 8.2E-02 | 3.6E-01  |
| <b>TNF-alpha signalling</b> |                                                                                                      |       |      |         |          |
| KEGG_PATHWAY                | <a href="#">TNF signaling pathway</a>                                                                | 15    | 19.7 | 6.7E-13 | 1.0E-10  |
| BIOCARTA                    | <a href="#">TNFR2 Signaling Pathway</a>                                                              | 8     | 10.5 | 4.8E-07 | 7.4E-05  |
| BIOCARTA                    | <a href="#">TNF/Stress Related Signaling</a>                                                         | 8     | 10.5 | 6.2E-06 | 3.2E-04  |
| GOTERM_BP_DIRECT            | <a href="#">tumor necrosis factor-mediated signaling pathway</a>                                     | 7     | 9.2  | 1.4E-05 | 8.5E-04  |
| GOTERM_BP_DIRECT            | <a href="#">cellular response to tumor necrosis factor</a>                                           | 5     | 6.6  | 1.5E-03 | 3.6E-02  |
| <b>NF-kB signalling</b>     |                                                                                                      |       |      |         |          |
| KEGG_PATHWAY                | <a href="#">Toll-like receptor signaling pathway</a>                                                 | 11    | 14.5 | 4.8E-08 | 5.3E-07  |
| KEGG_PATHWAY                | <a href="#">NF-kappa B signaling pathway</a>                                                         | 11    | 14.5 | 7.0E-09 | 1.2E-07  |
| KEGG_PATHWAY                | <a href="#">NOD-like receptor signaling pathway</a>                                                  | 10    | 13.2 | 1.7E-09 | 5.2E-08  |
| GOTERM_BP_DIRECT            | <a href="#">positive regulation of NF-kappaB transcription factor activity</a>                       | 10    | 13.2 | 7.5E-09 | 2.0E-06  |
| GOTERM_BP_DIRECT            | <a href="#">positive regulation of I-kappaB kinase/NF-kappaB signaling</a>                           | 9     | 11.8 | 5.9E-07 | 7.6E-05  |
| KEGG_PATHWAY                | <a href="#">RIG-I-like receptor signaling pathway</a>                                                | 9     | 11.8 | 2.7E-07 | 2.7E-06  |
| REACTOME_PATHWAY            | <a href="#">R-HSA-445989 (TAK1 activates NFkB by phosphorylation and activation of IKKs complex)</a> | 8     | 10.5 | 7.8E-10 | 2.0E-07  |
| REACTOME_PATHWAY            | <a href="#">R-HSA-168638 (NOD1/2 Signaling Pathway)</a>                                              | 7     | 9.2  | 1.2E-07 | 1.5E-05  |
| KEGG_PATHWAY                | <a href="#">Cytosolic DNA-sensing pathway</a>                                                        | 7     | 9.2  | 2.9E-05 | 1.6E-04  |
| BIOCARTA                    | <a href="#">NF-kB Signaling Pathway</a>                                                              | 7     | 9.2  | 4.8E-05 | 1.5E-03  |
| REACTOME_PATHWAY            | <a href="#">R-HSA-1810476 (RIP-mediated NFkB activation via ZBP1)</a>                                | 6     | 7.9  | 2.2E-07 | 1.8E-05  |
| REACTOME_PATHWAY            | <a href="#">R-HSA-933542 (TRAF6 mediated NF-kB activation)</a>                                       | 6     | 7.9  | 4.5E-07 | 2.8E-05  |
| REACTOME_PATHWAY            | <a href="#">R-HSA-2871837 (FCERI mediated NF-kB activation)</a>                                      | 6     | 7.9  | 2.2E-03 | 2.7E-02  |
| GOTERM_BP_DIRECT            | <a href="#">nucleotide-binding oligomerization domain containing signaling pathway</a>               | 5     | 6.6  | 4.3E-06 | 3.3E-04  |
| GOTERM_BP_DIRECT            | <a href="#">I-kappaB kinase/NF-kappaB signaling</a>                                                  | 5     | 6.6  | 1.5E-04 | 6.4E-03  |
| GOTERM_BP_DIRECT            | <a href="#">NIK/NF-kappaB signaling</a>                                                              | 4     | 5.3  | 3.2E-03 | 6.1E-02  |
| GOTERM_BP_DIRECT            | <a href="#">negative regulation of NF-kappaB transcription factor activity</a>                       | 4     | 5.3  | 3.9E-03 | 7.2E-02  |
| REACTOME_PATHWAY            | <a href="#">R-HSA-5668541 (TNFR2 non-canonical NF-kB pathway)</a>                                    | 4     | 5.3  | 1.1E-02 | 8.9E-02  |
| <b>MAPK signalling</b>      |                                                                                                      |       |      |         |          |
| KEGG_PATHWAY                | <a href="#">MAPK signaling pathway</a>                                                               | 9     | 11.8 | 2.8E-03 | 8.9E-03  |
| BIOCARTA                    | <a href="#">MAPKinase Signaling Pathway</a>                                                          | 7     | 9.2  | 5.1E-02 | 2.6E-01  |
| GOTERM_BP_DIRECT            | <a href="#">MAPK cascade</a>                                                                         | 5     | 6.6  | 3.0E-02 | 3E-01    |
| GOTERM_BP_DIRECT            | <a href="#">positive regulation of MAPK cascade</a>                                                  | 4     | 5.3  | 5.7E-03 | 9.1E-02  |
| GOTERM_BP_DIRECT            | <a href="#">activation of MAPK activity</a>                                                          | 4     | 5.3  | 1.2E-02 | 1.6E-01  |

## Supplementary Table S5

| Category                    | Term                                                                                                 | Count | %    | P-Value | Benjamin |
|-----------------------------|------------------------------------------------------------------------------------------------------|-------|------|---------|----------|
| <b>TCR activation</b>       |                                                                                                      |       |      |         |          |
| KEGG_PATHWAY                | <a href="#">T cell receptor signaling pathway</a>                                                    | 12    | 13.3 | 1.8E-08 | 1.6E-07  |
| GOTERM_BP_DIRECT            | <a href="#">T cell receptor signaling pathway</a>                                                    | 10    | 11.1 | 8.8E-08 | 1.4E-05  |
| REACTOME_PATHWAY            | <a href="#">R-HSA-202424 (Downstream TCR signaling)</a>                                              | 7     | 7.8  | 1.4E-04 | 3.4E-03  |
| BIOCARTA                    | <a href="#">T Cell Receptor Signaling Pathway</a>                                                    | 7     | 7.8  | 4.6E-03 | 5.2E-02  |
| <b>Apoptosis</b>            |                                                                                                      |       |      |         |          |
| UP_KEYWORDS                 | <a href="#">Apoptosis</a>                                                                            | 18    | 20.0 | 1.2E-10 | 6.1E-09  |
| GOTERM_BP_DIRECT            | <a href="#">apoptotic process</a>                                                                    | 17    | 18.9 | 4.2E-08 | 7.2E-06  |
| GOTERM_BP_DIRECT            | <a href="#">regulation of apoptotic process</a>                                                      | 12    | 13.3 | 1.6E-08 | 3.2E-06  |
| GOTERM_BP_DIRECT            | <a href="#">negative regulation of apoptotic process</a>                                             | 12    | 13.3 | 2.8E-05 | 1.3E-03  |
| GOTERM_BP_DIRECT            | <a href="#">positive regulation of apoptotic process</a>                                             | 11    | 12.2 | 4.2E-06 | 3.2E-04  |
| KEGG_PATHWAY                | <a href="#">Apoptosis</a>                                                                            | 6     | 6.7  | 6.7E-04 | 2.5E-03  |
| GOTERM_BP_DIRECT            | <a href="#">apoptotic signaling pathway</a>                                                          | 5     | 5.6  | 5.5E-04 | 1.3E-02  |
| GOTERM_BP_DIRECT            | <a href="#">activation of cysteine-type endopeptidase activity involved in apoptotic process</a>     | 5     | 5.6  | 9.8E-04 | 2.1E-02  |
| GOTERM_BP_DIRECT            | <a href="#">positive regulation of apoptotic signaling pathway</a>                                   | 4     | 4.4  | 3.0E-04 | 9.3E-03  |
| GOTERM_BP_DIRECT            | <a href="#">extrinsic apoptotic signaling pathway via death domain receptors</a>                     | 4     | 4.4  | 1.1E-03 | 2.3E-02  |
| GOTERM_BP_DIRECT            | <a href="#">intrinsic apoptotic signaling pathway in response to DNA damage</a>                      | 4     | 4.4  | 2.0E-03 | 3.7E-02  |
| BIOCARTA                    | <a href="#">Neuropeptides VIP and PACAP inhibit the apoptosis of activated T cells</a>               | 4     | 4.4  | 6.8E-02 | 3.1E-01  |
| <b>TNF-alpha signalling</b> |                                                                                                      |       |      |         |          |
| KEGG_PATHWAY                | <a href="#">TNF signaling pathway</a>                                                                | 16    | 17.8 | 5.3E-13 | 2.7E-11  |
| BIOCARTA                    | <a href="#">TNFR2 Signaling Pathway</a>                                                              | 9     | 10.0 | 7.1E-08 | 1.1E-05  |
| BIOCARTA                    | <a href="#">TNF/Stress Related Signaling</a>                                                         | 8     | 8.9  | 1.9E-05 | 7.6E-04  |
| GOTERM_BP_DIRECT            | <a href="#">tumor necrosis factor-mediated signaling pathway</a>                                     | 7     | 7.8  | 3.8E-05 | 1.7E-03  |
| GOTERM_BP_DIRECT            | <a href="#">cellular response to tumor necrosis factor</a>                                           | 6     | 6.7  | 3.0E-04 | 9.3E-03  |
| GOTERM_BP_DIRECT            | <a href="#">regulation of tumor necrosis factor-mediated signaling pathway</a>                       | 4     | 4.4  | 5.3E-04 | 1.3E-02  |
| REACTOME_PATHWAY            | <a href="#">R-HSA-5357905 (Regulation of TNFR1 signaling)</a>                                        | 4     | 4.4  | 2.2E-03 | 2.7E-02  |
| <b>NF-kB signalling</b>     |                                                                                                      |       |      |         |          |
| KEGG_PATHWAY                | <a href="#">Toll-like receptor signaling pathway</a>                                                 | 14    | 15.6 | 1.4E-10 | 3.6E-09  |
| GOTERM_BP_DIRECT            | <a href="#">positive regulation of I-kappaB kinase/NF-kappaB signaling</a>                           | 12    | 13.3 | 8.6E-10 | 2.4E-07  |
| KEGG_PATHWAY                | <a href="#">NF-kappa B signaling pathway</a>                                                         | 12    | 13.3 | 3.0E-09 | 3.8E-08  |
| KEGG_PATHWAY                | <a href="#">NOD-like receptor signaling pathway</a>                                                  | 11    | 12.2 | 4.1E-10 | 7.9E-09  |
| GOTERM_BP_DIRECT            | <a href="#">positive regulation of NF-kappaB transcription factor activity</a>                       | 11    | 12.2 | 2.1E-09 | 4.8E-07  |
| KEGG_PATHWAY                | <a href="#">RIG-I-like receptor signaling pathway</a>                                                | 11    | 12.2 | 4.9E-09 | 5.7E-08  |
| KEGG_PATHWAY                | <a href="#">Cytosolic DNA-sensing pathway</a>                                                        | 10    | 11.1 | 3.5E-08 | 3.0E-07  |
| REACTOME_PATHWAY            | <a href="#">R-HSA-445989 (TAK1 activates NFkB by phosphorylation and activation of IKKs complex)</a> | 8     | 8.9  | 2.6E-09 | 7.5E-07  |
| REACTOME_PATHWAY            | <a href="#">R-HSA-168638 (NOD1/2 Signaling Pathway)</a>                                              | 8     | 8.9  | 1.0E-08 | 1.5E-06  |
| BIOCARTA                    | <a href="#">NF-kB Signaling Pathway</a>                                                              | 7     | 7.8  | 1.2E-04 | 3.9E-03  |
| REACTOME_PATHWAY            | <a href="#">R-HSA-1810476 (RIP-mediated NFkB activation via ZBP1)</a>                                | 6     | 6.7  | 5.0E-07 | 4.8E-05  |
| REACTOME_PATHWAY            | <a href="#">R-HSA-933542 (TRAF6 mediated NF-kB activation)</a>                                       | 6     | 6.7  | 1.0E-06 | 7.5E-05  |
| REACTOME_PATHWAY            | <a href="#">R-HSA-2871837 (FCERI mediated NF-kB activation)</a>                                      | 6     | 6.7  | 4.5E-03 | 4.9E-02  |
| GOTERM_BP_DIRECT            | <a href="#">nucleotide-binding oligomerization domain containing signaling pathway</a>               | 5     | 5.6  | 8.6E-06 | 5.4E-04  |
| GOTERM_BP_DIRECT            | <a href="#">TRIF-dependent toll-like receptor signaling pathway</a>                                  | 5     | 5.6  | 1.4E-05 | 7.9E-04  |
| GOTERM_BP_DIRECT            | <a href="#">I-kappaB kinase/NF-kappaB signaling</a>                                                  | 5     | 5.6  | 2.9E-04 | 9.2E-03  |
| GOTERM_BP_DIRECT            | <a href="#">NIK/NF-kappaB signaling</a>                                                              | 5     | 5.6  | 4.1E-04 | 1.1E-02  |
| REACTOME_PATHWAY            | <a href="#">R-HSA-5357956 (TNFR1-induced NFkappaB signaling pathway)</a>                             | 4     | 4.4  | 1.7E-03 | 2.6E-02  |
| GOTERM_BP_DIRECT            | <a href="#">negative regulation of NF-kappaB transcription factor activity</a>                       | 4     | 4.4  | 6.3E-03 | 9.2E-02  |
| REACTOME_PATHWAY            | <a href="#">R-HSA-5668541 (TNFR2 non-canonical NF-kB pathway)</a>                                    | 4     | 4.4  | 1.7E-02 | 1.3E-01  |
| <b>MAPK signalling</b>      |                                                                                                      |       |      |         |          |
| KEGG_PATHWAY                | <a href="#">MAPK signaling pathway</a>                                                               | 9     | 10.0 | 8.4E-03 | 2.3E-02  |
| GOTERM_BP_DIRECT            | <a href="#">MAPK cascade</a>                                                                         | 7     | 7.8  | 2.7E-03 | 4.6E-02  |
| BIOCARTA                    | <a href="#">MAPKinase Signaling Pathway</a>                                                          | 7     | 7.8  | 9.7E-02 | 3.8E-01  |
| GOTERM_BP_DIRECT            | <a href="#">activation of MAPK activity</a>                                                          | 5     | 5.6  | 2.5E-03 | 4.4E-02  |
| GOTERM_BP_DIRECT            | <a href="#">positive regulation of MAPK cascade</a>                                                  | 4     | 4.4  | 9.1E-03 | 1.2E-01  |
| REACTOME_PATHWAY            | <a href="#">R-HSA-5673001 (RAF/MAP kinase cascade)</a>                                               | 4     | 4.4  | 6.4E-02 | 3.4E-01  |

## Supplementary Table S6

| Category                    | Term                                                                                                 | Count | %    | P-Value | Benjamini |
|-----------------------------|------------------------------------------------------------------------------------------------------|-------|------|---------|-----------|
| <b>TCR Activation</b>       |                                                                                                      |       |      |         |           |
| KEGG_PATHWAY                | <a href="#">T cell receptor signaling pathway</a>                                                    | 8     | 15.1 | 3.2E-06 | 2.8E-05   |
| GOTERM_BP_DIRECT            | <a href="#">T cell receptor signaling pathway</a>                                                    | 7     | 13.2 | 6.2E-06 | 5.8E-04   |
| REACTOME_PATHWAY            | <a href="#">R-HSA-202424 (Downstream TCR signaling)</a>                                              | 5     | 9.4  | 1.2E-03 | 2.2E-02   |
| BIOCARTA                    | <a href="#">T Cell Receptor Signaling Pathway</a>                                                    | 4     | 7.5  | 4.9E-02 | 2.1E-01   |
| <b>Apoptosis</b>            |                                                                                                      |       |      |         |           |
| GOTERM_BP_DIRECT            | <a href="#">apoptotic process</a>                                                                    | 14    | 26.4 | 1.2E-08 | 3.8E-06   |
| UP_KEYWORDS                 | <a href="#">Apoptosis</a>                                                                            | 13    | 24.5 | 6.9E-09 | 2.9E-07   |
| GOTERM_BP_DIRECT            | <a href="#">regulation of apoptotic process</a>                                                      | 9     | 17.0 | 2.7E-07 | 4.3E-05   |
| GOTERM_BP_DIRECT            | <a href="#">positive regulation of apoptotic process</a>                                             | 7     | 13.2 | 3.2E-04 | 1.2E-02   |
| GOTERM_BP_DIRECT            | <a href="#">negative regulation of apoptotic process</a>                                             | 7     | 13.2 | 2.7E-03 | 6.8E-02   |
| KEGG_PATHWAY                | <a href="#">Apoptosis</a>                                                                            | 6     | 11.3 | 4.1E-05 | 2.7E-04   |
| GOTERM_BP_DIRECT            | <a href="#">activation of cysteine-type endopeptidase activity involved in apoptotic process</a>     | 5     | 9.4  | 1.3E-04 | 5.6E-03   |
| BIOCARTA                    | <a href="#">Neuropeptides VIP and PACAP inhibit the apoptosis of activated T cells</a>               | 4     | 7.5  | 1.2E-02 | 7.5E-02   |
| BIOCARTA                    | <a href="#">Induction of apoptosis through DR3 and DR4/5 Death Receptors</a>                         | 4     | 7.5  | 2.3E-02 | 1.2E-01   |
| <b>TNF-alpha Signalling</b> |                                                                                                      |       |      |         |           |
| KEGG_PATHWAY                | <a href="#">TNF signaling pathway</a>                                                                | 11    | 20.8 | 7.5E-10 | 2.2E-08   |
| BIOCARTA                    | <a href="#">TNF/Stress Related Signaling</a>                                                         | 8     | 15.1 | 1.7E-07 | 1.0E-05   |
| BIOCARTA                    | <a href="#">TNFR2 Signaling Pathway</a>                                                              | 6     | 11.3 | 1.3E-05 | 4.0E-04   |
| GOTERM_BP_DIRECT            | <a href="#">cellular response to tumor necrosis factor</a>                                           | 4     | 7.5  | 4.8E-03 | 9.9E-02   |
| GOTERM_BP_DIRECT            | <a href="#">tumor necrosis factor-mediated signaling pathway</a>                                     | 4     | 7.5  | 5.8E-03 | 1.1E-01   |
| <b>NF-KB Signalling</b>     |                                                                                                      |       |      |         |           |
| KEGG_PATHWAY                | <a href="#">NF-kappa B signaling pathway</a>                                                         | 11    | 20.8 | 1.0E-10 | 1.5E-08   |
| KEGG_PATHWAY                | <a href="#">Toll-like receptor signaling pathway</a>                                                 | 11    | 20.8 | 7.5E-10 | 2.2E-08   |
| KEGG_PATHWAY                | <a href="#">RIG-I-like receptor signaling pathway</a>                                                | 10    | 18.9 | 3.5E-10 | 1.7E-08   |
| GOTERM_BP_DIRECT            | <a href="#">positive regulation of I-kappaB kinase/NF-kappaB signaling</a>                           | 10    | 18.9 | 1.4E-09 | 1.3E-06   |
| GOTERM_BP_DIRECT            | <a href="#">positive regulation of NF-kappaB transcription factor activity</a>                       | 8     | 15.1 | 1.7E-07 | 3.1E-05   |
| KEGG_PATHWAY                | <a href="#">NOD-like receptor signaling pathway</a>                                                  | 9     | 17.0 | 1.4E-09 | 3.3E-08   |
| REACTOME_PATHWAY            | <a href="#">R-HSA-168638 (NOD1/2 Signaling Pathway)</a>                                              | 7     | 13.2 | 1.2E-08 | 2.7E-06   |
| REACTOME_PATHWAY            | <a href="#">R-HSA-933542 (TRAF6 mediated NF-kB activation)</a>                                       | 6     | 11.3 | 6.6E-08 | 7.5E-06   |
| REACTOME_PATHWAY            | <a href="#">R-HSA-445989 (TAK1 activates NFkB by phosphorylation and activation of IKKs complex)</a> | 6     | 11.3 | 2.2E-07 | 1.6E-05   |
| BIOCARTA                    | <a href="#">NF-kB Signaling Pathway</a>                                                              | 6     | 11.3 | 4.8E-05 | 1.2E-03   |
| REACTOME_PATHWAY            | <a href="#">R-HSA-1810476 (RIP-mediated NFkB activation via ZBP1)</a>                                | 5     | 9.4  | 2.2E-06 | 1.0E-04   |
| REACTOME_PATHWAY            | <a href="#">R-HSA-2871837 (FCERI mediated NF-kB activation)</a>                                      | 5     | 9.4  | 3.6E-03 | 4.7E-02   |
| GOTERM_BP_DIRECT            | <a href="#">nucleotide-binding oligomerization domain containing signaling pathway</a>               | 4     | 7.5  | 6.1E-05 | 3.6E-03   |
| GOTERM_BP_DIRECT            | <a href="#">toll-like receptor signaling pathway</a>                                                 | 4     | 7.5  | 7.8E-05 | 4.0E-03   |
| GOTERM_BP_DIRECT            | <a href="#">TRIF-dependent toll-like receptor signaling pathway</a>                                  | 4     | 7.5  | 8.7E-05 | 4.3E-03   |
| GOTERM_BP_DIRECT            | <a href="#">NIK/NF-kappaB signaling</a>                                                              | 4     | 7.5  | 1.1E-03 | 3.4E-02   |
| <b>MAPK Signalling</b>      |                                                                                                      |       |      |         |           |
| KEGG_PATHWAY                | <a href="#">MAPK signaling pathway</a>                                                               | 8     | 15.1 | 1.0E-03 | 4.6E-03   |
| BIOCARTA                    | <a href="#">MAPKinase Signaling Pathway</a>                                                          | 7     | 13.2 | 4.9E-03 | 3.9E-02   |
| BIOCARTA                    | <a href="#">Human Cytomegalovirus and Map Kinase Pathways</a>                                        | 4     | 7.5  | 3.6E-03 | 3.3E-02   |
| GOTERM_BP_DIRECT            | <a href="#">activation of MAPK activity</a>                                                          | 4     | 7.5  | 4.4E-03 | 9.4E-02   |
| GOTERM_BP_DIRECT            | <a href="#">MAPK cascade</a>                                                                         | 4     | 7.5  | 4.7E-02 | 4.3E-01   |
